# Supplementary material for: Movienet: a movie multilayer network model using visual and textual semantic cues
Source: Springer Nature journal article supplement (doi:10.1007/s41109-019-0226-0), 2019-12-01
Supplement: 41109_2019_226_MOESM1_ESM.pdf [file 41109_2019_226_MOESM1_ESM.pdf]

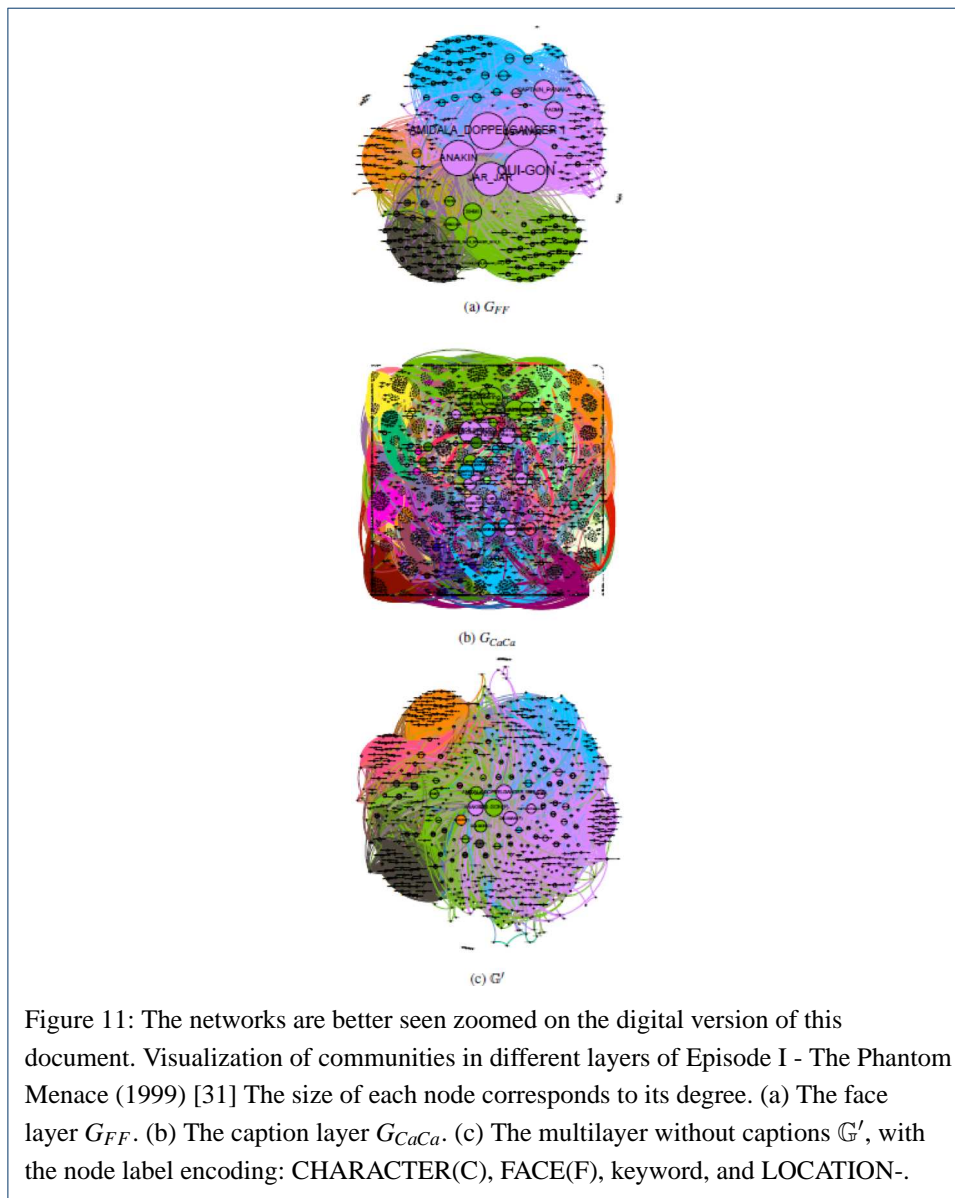

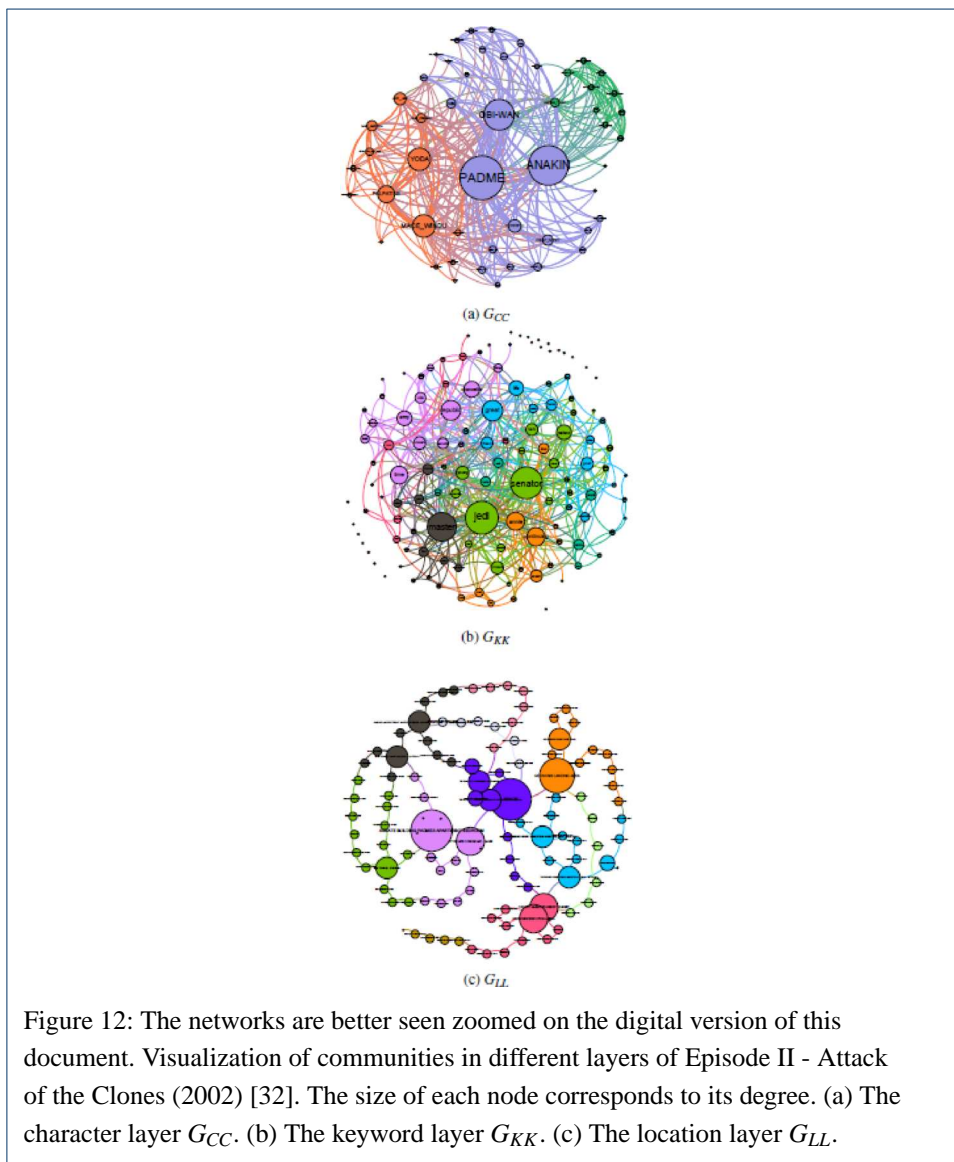

Figure 12: The networks are better seen zoomed on the digital version of this document. Visualization of communities in different layers of Episode II - Attack of the Clones (2002) [32]. The size of each node corresponds to its degree. (a) The character layer  $G_{CC}$ . (b) The keyword layer  $G_{KK}$ . (c) The location layer  $G_{LL}$ .

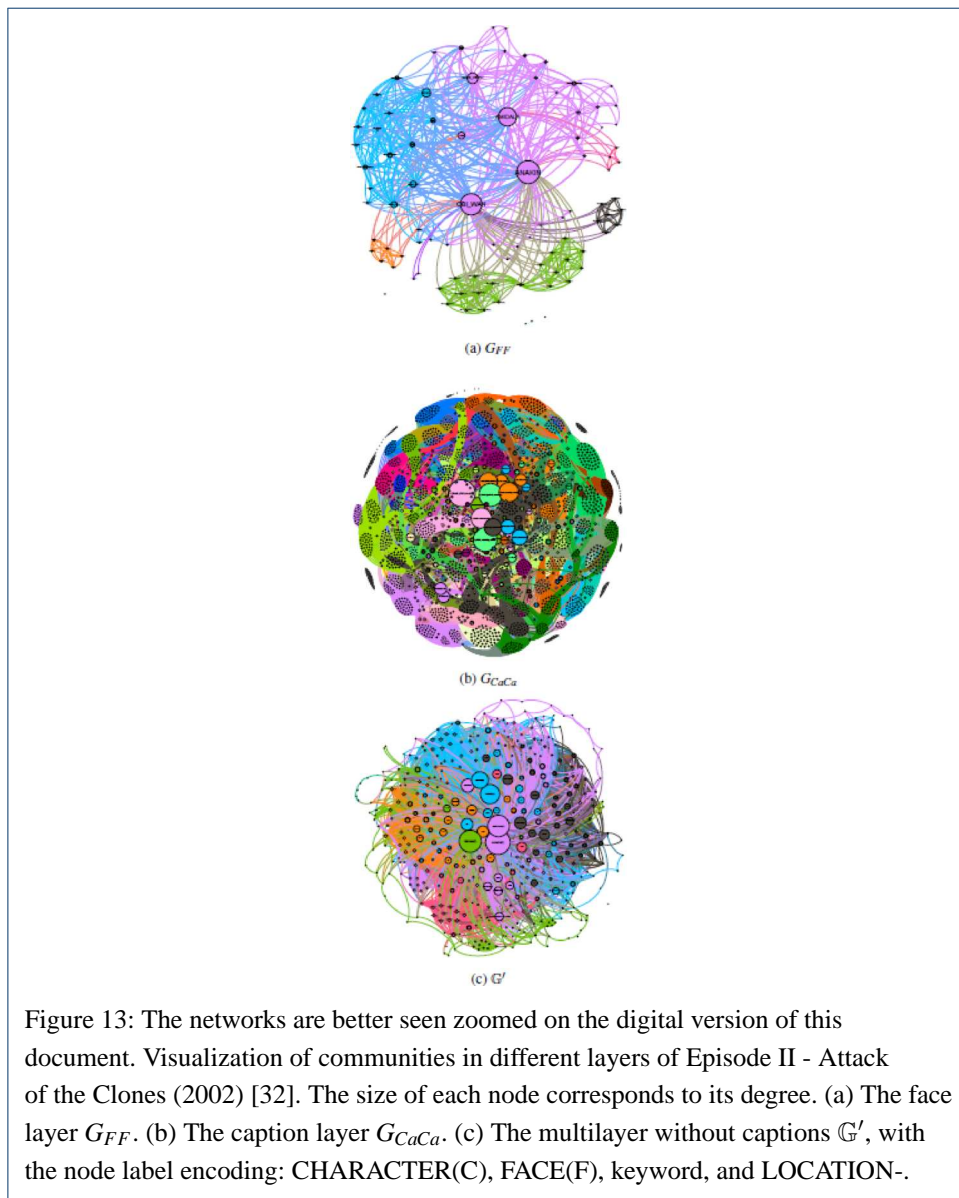

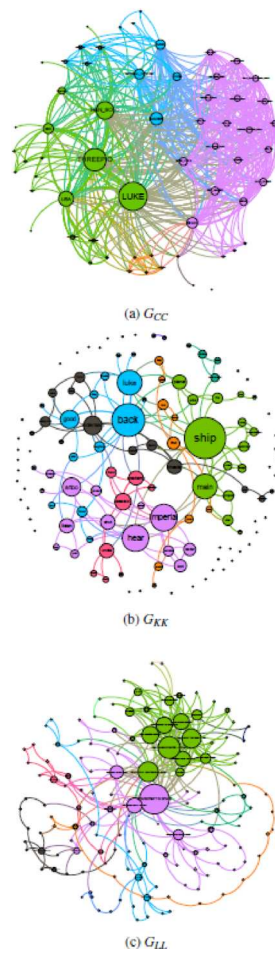

Figure 14: The networks are better seen zoomed on the digital version of this document. Visualization of communities in different layers of Episode IV - A New Hope (1977) [28]. The size of each node corresponds to its degree. (a) The character layer  $G_{CC}$ . (b) The keyword layer  $G_{KK}$ . (c) The location layer  $G_{LL}$ .

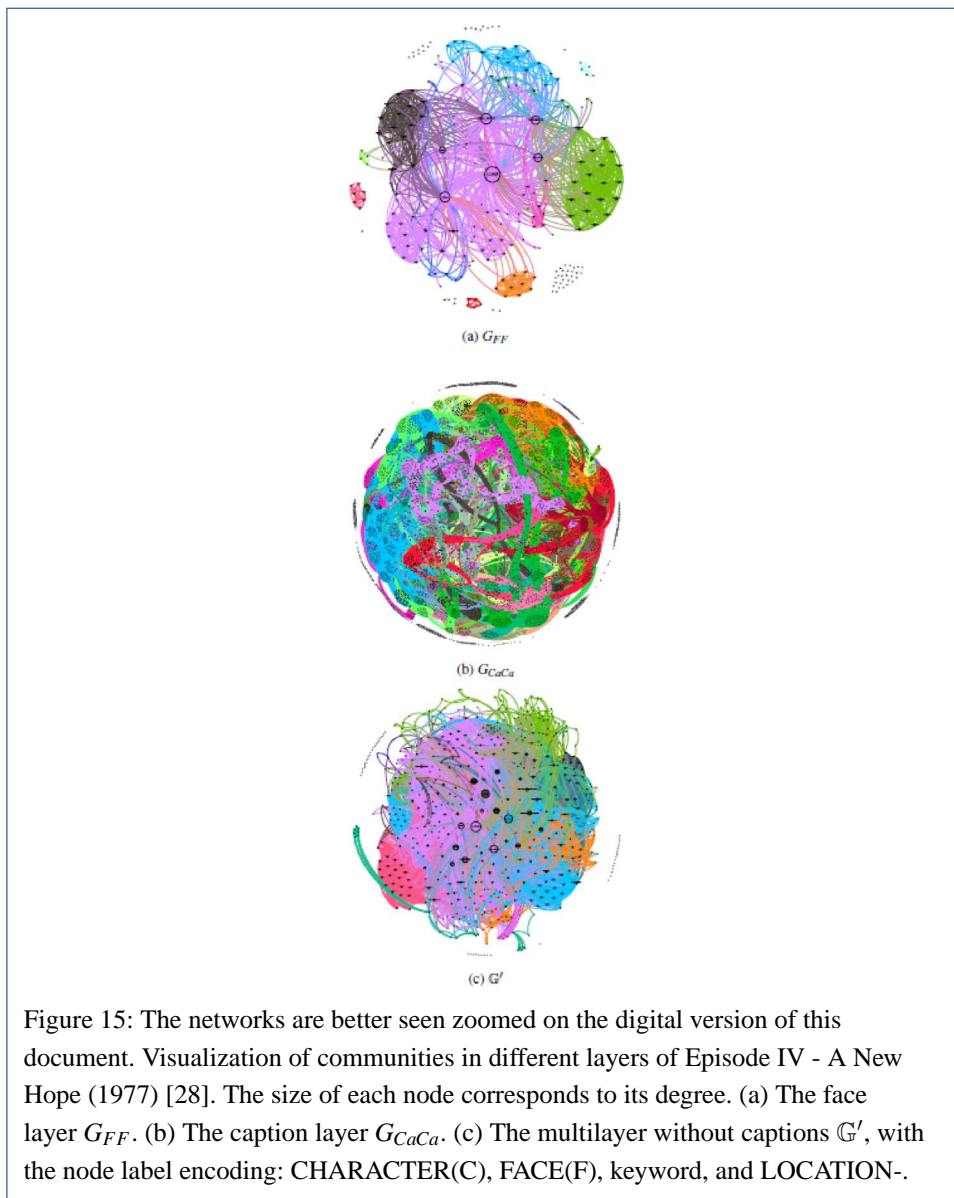

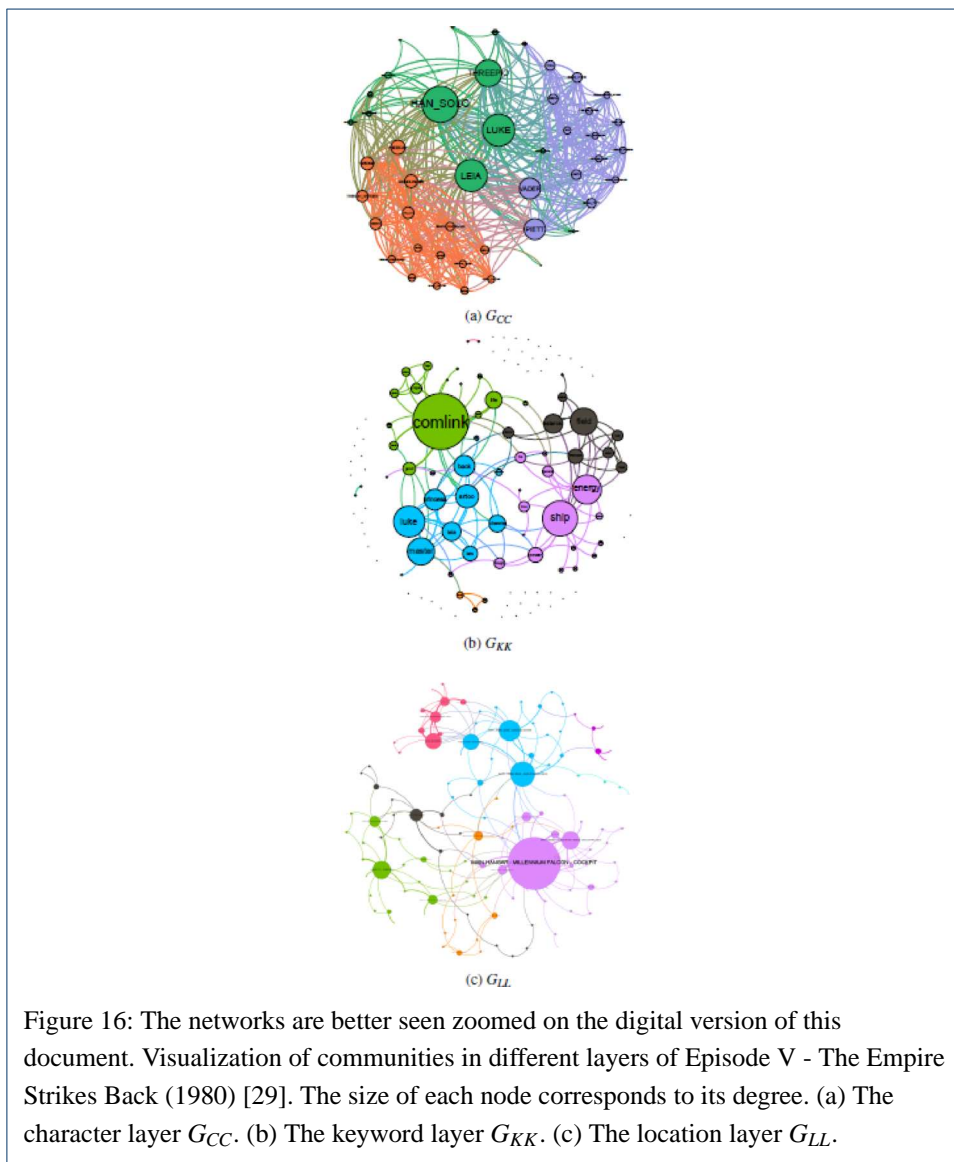

Figure 16: The networks are better seen zoomed on the digital version of this document. Visualization of communities in different layers of Episode V - The Empire Strikes Back (1980) [29]. The size of each node corresponds to its degree. (a) The character layer  $G_{CC}$ . (b) The keyword layer  $G_{KK}$ . (c) The location layer  $G_{LL}$ .

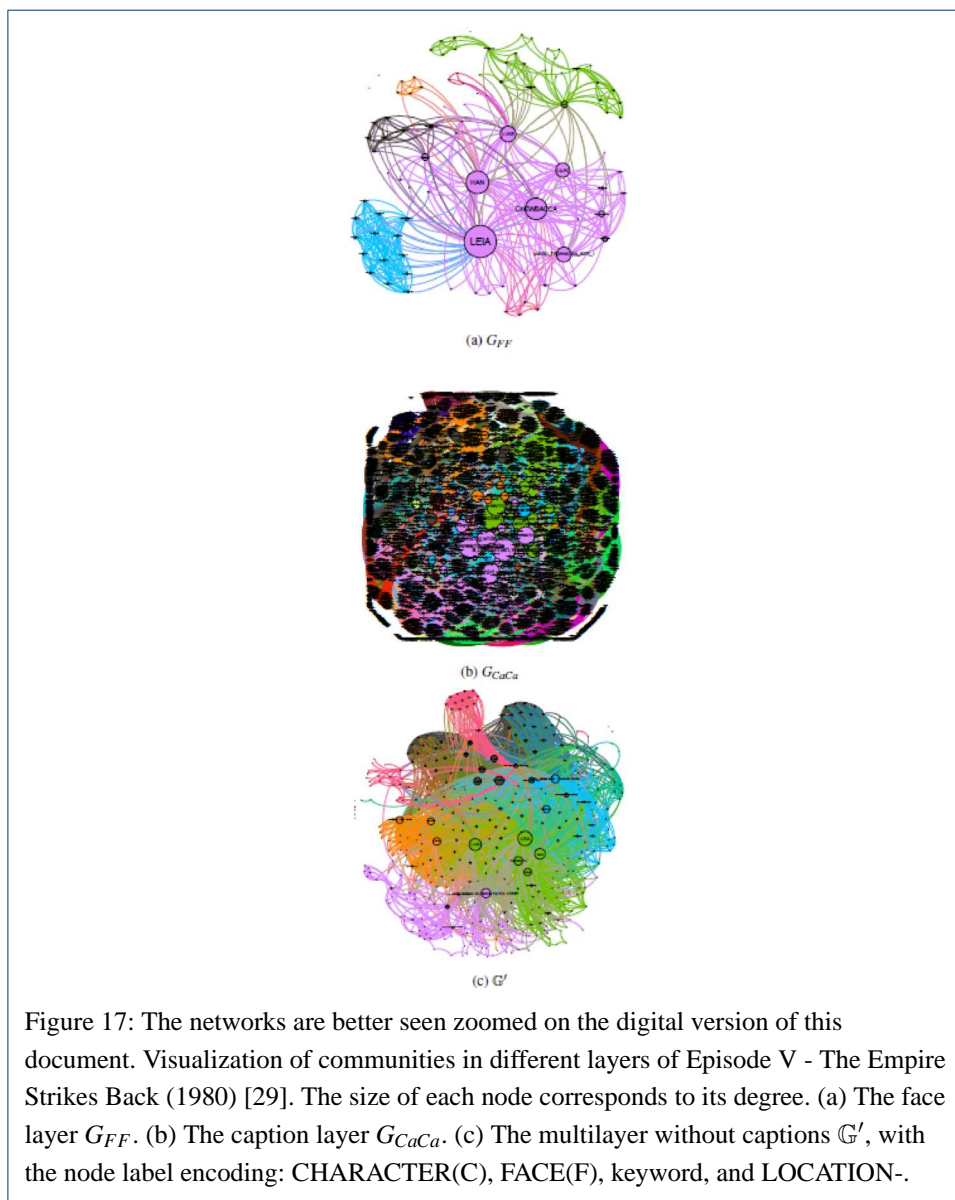



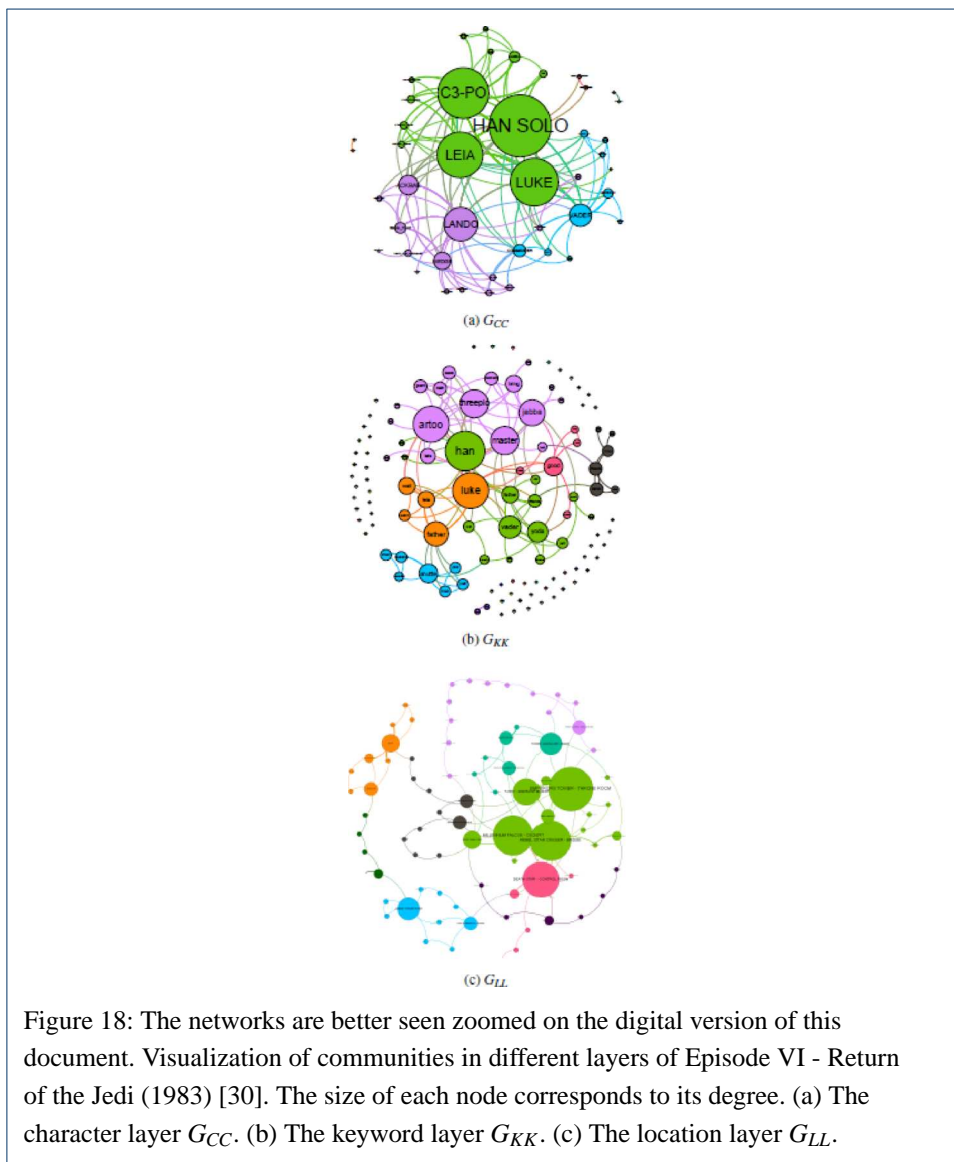

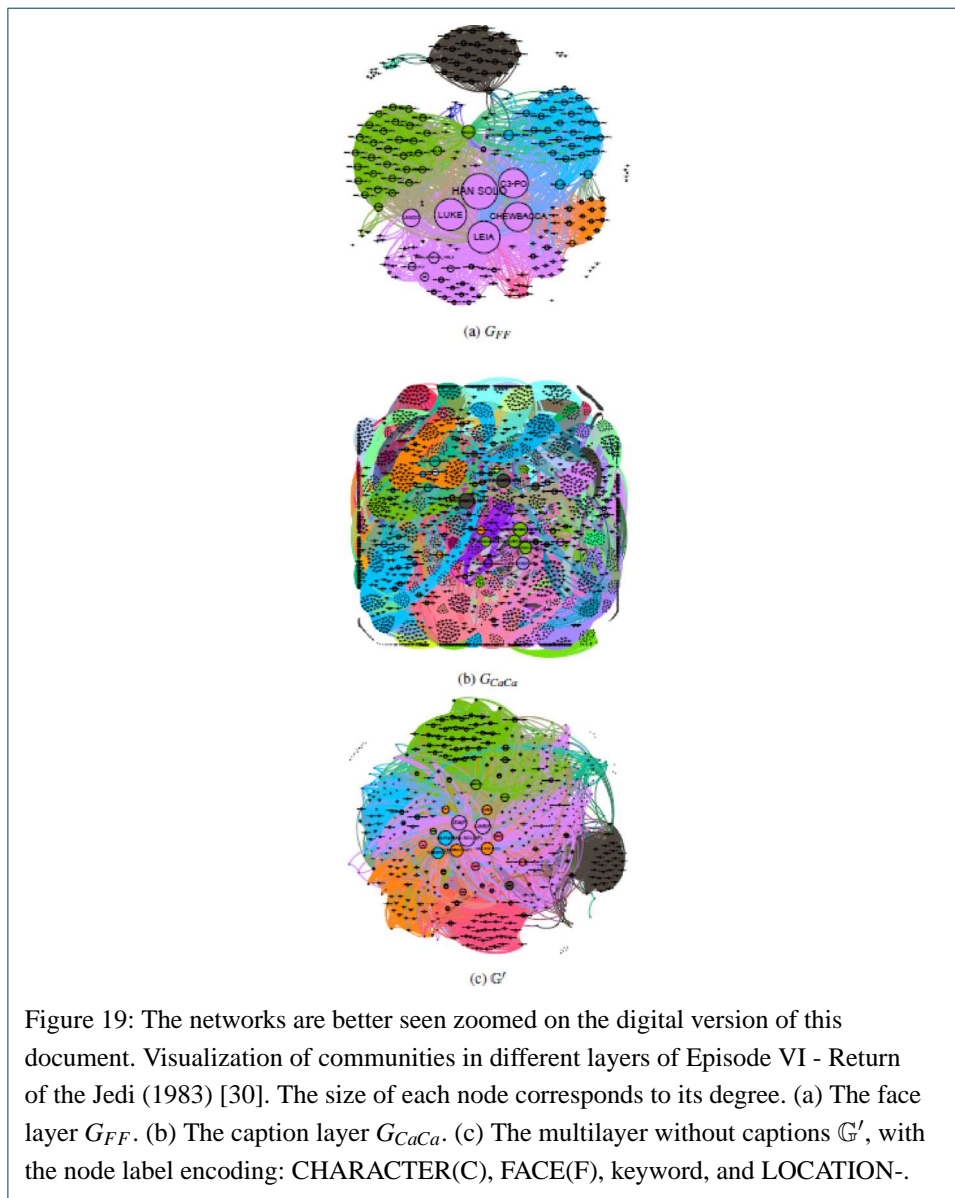

|     |                 | CHARACTERS $G_{CC}$ |                        |        |           |     |                  |      |
|-----|-----------------|---------------------|------------------------|--------|-----------|-----|------------------|------|
|     | INFLUENCE SCORE |                     | BETWEENNESS CENTRALITY |        | DEGREE    |     | EIGEN CENTRALITY |      |
| SW1 | Q.GON           | 1,00                | Q.GON                  | 365,29 | Q.GON     | 188 | Q.GON            | 1,00 |
|     | ANAKIN          | 2,33                | J.JAR                  | 262,28 | ANAKIN    | 151 | ANAKIN           | 0,77 |
|     | J.JAR           | 2,67                | ANAKIN                 | 256,84 | J.JAR     | 131 | J.JAR            | 0,74 |
|     | O.WAN           | 4,67                | AMIDALA                | 243,94 | PADME     | 110 | O.WAN            | 0,70 |
|     | PADME           | 5,00                | O.WAN                  | 145,97 | O.WAN     | 109 | PADME            | 0,63 |
|     | AMIDALA         | 5,67                | PADME                  | 124,22 | AMIDALA   | 82  | PANAKA           | 0,46 |
|     | PANAKA          | 7,33                | NUTE                   | 109,11 | PANAKA    | 78  | AMIDALA          | 0,36 |
|     | NUTE            | 8,00                | PALPATINE              | 105,27 | NUTE      | 61  | SHMI             | 0,31 |
|     | PALPATINE       | 9,33                | PANAKA                 | 54,91  | PALPATINE | 48  | NUTE             | 0,28 |
|     | R.OLIE          | 10,67               | DOFINE                 | 10,99  | SHMI      | 42  | R.OLIE           | 0,24 |
| SW2 | PADME           | 1,00                | PADME                  | 380,80 | PADME     | 154 | PADME            | 1,00 |
|     | ANAKIN          | 2,00                | ANAKIN                 | 259,02 | ANAKIN    | 139 | ANAKIN           | 0,95 |
|     | O.WAN           | 3,00                | O.WAN                  | 173,52 | O.WAN     | 105 | O.WAN            | 0,75 |
|     | M.WINDU         | 4,33                | YODA                   | 42,04  | M.WINDU   | 75  | M.WINDU          | 0,60 |
|     | YODA            | 4,67                | M.WINDU                | 32,98  | YODA      | 75  | YODA             | 0,57 |
|     | PALPATINE       | 6,33                | C-3PO                  | 10,92  | PALPATINE | 54  | PALPATINE        | 0,42 |
|     | C-3PO           | 6,67                | PALPATINE              | 10,58  | C-3PO     | 38  | C-3PO            | 0,33 |
|     | J.JAR           | 8,33                | C.TYPHO                | 10,57  | J.JAR     | 36  | J.JAR            | 0,30 |
|     | C.DOOKU         | 9,67                | J.JAR                  | 5,11   | M.AMEDDA  | 29  | C.DOOKU          | 0,26 |
|     | M.AMEDDA        | 11,00               | C.DOOKU                | 2,91   | C.DOOKU   | 29  | M.AMEDDA         | 0,22 |
| SW3 | O.WAN           | 1,00                | O.WAN                  | 138,18 | O.WAN     | 108 | O.WAN            | 1,00 |
|     | PALPATINE       | 2,67                | PADME                  | 129,22 | PALPATINE | 99  | ANAKIN           | 0,94 |
|     | ANAKIN          | 3,00                | PALPATINE              | 102,65 | ANAKIN    | 98  | PALPATINE        | 0,92 |
|     | PADME           | 3,33                | ANAKIN                 | 91,95  | PADME     | 96  | PADME            | 0,83 |
|     | YODA            | 5,00                | YODA                   | 77,58  | YODA      | 88  | YODA             | 0,82 |
|     | B.ORGANA        | 6,33                | GRIEVOUS               | 60,93  | B.ORGANA  | 64  | B.ORGANA         | 0,50 |
|     | D.VADER         | 8,00                | B.ORGANA               | 57,94  | N.GUNRAY  | 54  | D.VADER          | 0,48 |
|     | N.GUNRAY        | 8,33                | N.GUNRAY               | 39,60  | D.VADER   | 54  | M.WINDU          | 0,46 |
|     | GRIEVOUS        | 10,00               | D.VADER                | 16,51  | M.AMEDDA  | 46  | C.C.CODY         | 0,44 |
|     | M.AMEDDA        | 10,67               | M.MOTHMA               | 15,24  | GUARD     | 46  | N.GUNRAY         | 0,43 |
| SW4 | LUKE            | 1,00                | LUKE                   | 385,33 | LUKE      | 154 | LUKE             | 1,00 |
|     | C-3PO           | 2,00                | C-3PO                  | 271,48 | C-3PO     | 121 | C-3PO            | 0,83 |
|     | H.SOLO          | 3,00                | H.SOLO                 | 179,11 | H.SOLO    | 92  | H.SOLO           | 0,70 |
|     | LEIA            | 4,00                | LEIA                   | 132,40 | LEIA      | 77  | LEIA             | 0,60 |
|     | VADER           | 5,33                | VADER                  | 127,91 | VADER     | 64  | BEN              | 0,50 |
|     | BIGGS           | 6,67                | BIGGS                  | 79,29  | BIGGS     | 54  | VADER            | 0,32 |
|     | I.OFFICER       | 8,67                | CHIEF                  | 58,00  | BEN       | 51  | TROOPER          | 0,28 |
|     | BEN             | 8,67                | TARKIN                 | 51,90  | I.OFFICER | 49  | BIGGS            | 0,26 |
|     | TARKIN          | 9,33                | I.OFFICER              | 42,03  | TARKIN    | 47  | I.OFFICER        | 0,24 |
|     | R.LEADER        | 11,33               | R.LEADER               | 23,65  | B.VOICE   | 39  | B.VOICE          | 0,22 |
| SW5 | H.SOLO          | 1,00                | H.SOLO                 | 158,34 | H.SOLO    | 108 | H.SOLO           | 1,00 |
|     | LUKE            | 2,33                | LUKE                   | 100,45 | LUKE      | 95  | LEIA             | 0,91 |
|     | LEIA            | 3,00                | C-3PO                  | 83,76  | LEIA      | 95  | LUKE             | 0,89 |
|     | C-3PO           | 3,67                | LEIA                   | 82,81  | C-3PO     | 79  | C-3PO            | 0,80 |
|     | PIETT           | 5,00                | PIETT                  | 44,48  | PIETT     | 62  | PIETT            | 0,55 |
|     | VADER           | 6,00                | VADER                  | 44,48  | VADER     | 62  | VADER            | 0,55 |
|     | RIEEKAN         | 7,33                | DERLIN                 | 11,92  | RIEEKAN   | 41  | RIEEKAN          | 0,38 |
|     | ANNOUNCER       | 8,33                | RIEEKAN                | 4,84   | ANNOUNCER | 37  | ANNOUNCER        | 0,33 |
|     | WEDGE           | 9,33                | ANNOUNCER              | 4,56   | WEDGE     | 37  | WEDGE            | 0,33 |
|     | VEERS           | 10,33               | WEDGE                  | 4,56   | VEERS     | 33  | VEERS            | 0,26 |
| SW6 | H.SOLO          | 1,33                | LANDO                  | 199,35 | H.SOLO    | 84  | H.SOLO           | 1,00 |
|     | C-3PO           | 2,67                | H.SOLO                 | 174,41 | C-3PO     | 68  | C-3PO            | 0,86 |
|     | LUKE            | 3,33                | LUKE                   | 115,15 | LUKE      | 64  | LEIA             | 0,79 |
|     | LANDO           | 3,67                | C-3PO                  | 106,90 | LEIA      | 61  | LUKE             | 0,77 |
|     | LEIA            | 4,00                | LEIA                   | 105,88 | LANDO     | 44  | LANDO            | 0,35 |
|     | VADER           | 6,00                | VADER                  | 62,55  | VADER     | 28  | VADER            | 0,25 |
|     | ACKBAR          | 8,00                | D.S.CONTROLLER         | 39,97  | ACKBAR    | 24  | ACKBAR           | 0,24 |
|     | WEDGE           | 8,67                | COMMANDER              | 30,52  | WEDGE     | 21  | JABBA            | 0,14 |
|     | COMMANDER       | 9,00                | WEDGE                  | 28,81  | COMMANDER | 14  | WEDGE            | 0,11 |
|     | JABBA           | 10,33               | ACKBAR                 | 26,95  | JABBA     | 12  | COMMANDER        | 0,11 |

Table 9: Top 10 nodes sorted and their different metrics of the character layer  $G_{CC}$  for each of the 6 SW movies.

|            |                 | KEYWORDS $G_{KK}$      |            |         |            |                  |            |      |
|------------|-----------------|------------------------|------------|---------|------------|------------------|------------|------|
|            | INFLUENCE SCORE | BETWEENNESS CENTRALITY |            | DEGREE  |            | EIGEN CENTRALITY |            |      |
| SW1        | federation      | 2,00                   | jedi       | 1031,44 | federation | 40               | queen      | 1,00 |
|            | jedi            | 3,00                   | federation | 780,77  | queen      | 40               | senate     | 0,89 |
|            | queen           | 3,67                   | master     | 663,90  | jedi       | 39               | federation | 0,86 |
|            | senate          | 5,33                   | naboo      | 608,94  | people     | 35               | people     | 0,81 |
|            | time            | 6,33                   | time       | 591,96  | senate     | 34               | jedi       | 0,74 |
|            | people          | 6,33                   | anakin     | 543,92  | chancellor | 32               | chancellor | 0,73 |
|            | naboo           | 6,67                   | stay       | 520,44  | time       | 32               | time       | 0,67 |
|            | master          | 8,67                   | queen      | 504,97  | naboo      | 31               | naboo      | 0,64 |
|            | back            | 9,33                   | senate     | 491,24  | back       | 29               | back       | 0,59 |
| chancellor | 9,33            | back                   | 454,75     | master  | 24         | amidala          | 0,49       |      |
| SW2        | jedi            | 1,00                   | jedi       | 868,82  | jedi       | 54               | jedi       | 1,00 |
|            | senator         | 2,00                   | senator    | 716,00  | senator    | 52               | senator    | 0,89 |
|            | master          | 3,00                   | master     | 714,63  | master     | 47               | master     | 0,82 |
|            | great           | 4,33                   | republic   | 427,07  | great      | 32               | great      | 0,53 |
|            | republic        | 4,67                   | great      | 411,79  | republic   | 31               | republic   | 0,49 |
|            | continuing      | 7,00                   | continuing | 405,95  | continuing | 28               | chancellor | 0,47 |
|            | annie           | 7,67                   | good       | 334,49  | annie      | 28               | time       | 0,46 |
|            | time            | 8,00                   | annie      | 258,02  | time       | 27               | annie      | 0,44 |
|            | chancellor      | 8,33                   | time       | 234,44  | chancellor | 24               | continuing | 0,40 |
| naboo      | 11,67           | chancellor             | 200,16     | army    | 22         | young            | 0,40       |      |
| SW3        | jedi            | 1,33                   | anakin     | 2014,27 | jedi       | 98               | jedi       | 1,00 |
|            | anakin          | 1,67                   | jedi       | 1570,81 | anakin     | 94               | anakin     | 0,84 |
|            | chancellor      | 4,33                   | force      | 586,47  | master     | 52               | council    | 0,66 |
|            | master          | 4,33                   | chancellor | 575,17  | chancellor | 52               | master     | 0,64 |
|            | force           | 5,33                   | time       | 468,35  | council    | 46               | chancellor | 0,58 |
|            | council         | 8,00                   | master     | 462,88  | force      | 40               | windu      | 0,49 |
|            | time            | 8,33                   | ship       | 325,23  | windu      | 40               | force      | 0,42 |
|            | windu           | 8,33                   | artoo      | 289,32  | republic   | 35               | great      | 0,37 |
|            | republic        | 9,33                   | back       | 281,10  | time       | 33               | senate     | 0,37 |
| yoda       | 12,33           | republic               | 249,93     | kenobi  | 32         | republic         | 0,35       |      |
| SW4        | ship            | 1,00                   | ship       | 1184,22 | ship       | 19               | ship       | 1,00 |
|            | han             | 2,33                   | han        | 680,24  | han        | 15               | main       | 0,68 |
|            | imperial        | 4,00                   | imperial   | 490,18  | hear       | 12               | han        | 0,67 |
|            | hear            | 4,00                   | luke       | 451,74  | imperial   | 12               | hear       | 0,60 |
|            | main            | 5,00                   | hear       | 399,62  | main       | 11               | imperial   | 0,52 |
|            | luke            | 5,33                   | chewie     | 322,44  | luke       | 11               | luke       | 0,50 |
|            | artoo           | 9,67                   | artoo      | 304,59  | artoo      | 8                | planet     | 0,40 |
|            | good            | 10,67                  | main       | 265,22  | alderaan   | 8                | computer   | 0,34 |
|            | chewie          | 11,00                  | uncle      | 237,43  | good       | 8                | shut       | 0,33 |
| shut       | 11,67           | good                   | 234,80     | season  | 7          | entire           | 0,32       |      |
| SW5        | father          | 1,00                   | father     | 561,06  | father     | 27               | father     | 1,00 |
|            | master          | 4,33                   | ship       | 448,13  | ship       | 17               | luke       | 0,92 |
|            | ship            | 4,67                   | chewie     | 230,04  | luke       | 15               | master     | 0,83 |
|            | luke            | 5,67                   | energy     | 216,38  | energy     | 14               | artoo      | 0,78 |
|            | artoo           | 6,00                   | master     | 213,43  | master     | 13               | princess   | 0,70 |
|            | energy          | 7,67                   | time       | 213,00  | field      | 13               | leia       | 0,63 |
|            | han             | 8,67                   | artoo      | 129,52  | artoo      | 11               | good       | 0,57 |
|            | chewie          | 10,00                  | fire       | 109,94  | han        | 10               | han        | 0,56 |
|            | field           | 10,33                  | moving     | 108,00  | princess   | 10               | field      | 0,50 |
| princess   | 12,00           | han                    | 91,63      | leia    | 9          | ship             | 0,50       |      |
| SW6        | han             | 1,00                   | han        | 370,59  | han        | 19               | han        | 1,00 |
|            | luke            | 2,00                   | luke       | 303,85  | luke       | 17               | luke       | 0,91 |
|            | artoo           | 4,00                   | father     | 284,27  | artoo      | 17               | threepio   | 0,82 |
|            | jabba           | 5,33                   | jabba      | 223,13  | master     | 13               | artoo      | 0,81 |
|            | father          | 5,67                   | artoo      | 200,19  | threepio   | 13               | master     | 0,76 |
|            | master          | 6,33                   | friends    | 170,16  | jabba      | 12               | jabba      | 0,54 |
|            | vader           | 9,00                   | shuttle    | 165,57  | father     | 11               | father     | 0,51 |
|            | threepio        | 9,33                   | good       | 149,85  | vader      | 10               | leia       | 0,46 |
|            | good            | 12,33                  | vader      | 139,09  | yoda       | 9                | lets       | 0,45 |
| yoda       | 14,00           | master                 | 136,10     | shuttle | 8          | vader            | 0,42       |      |

Table 10: Top 10 nodes sorted and their different metrics of the keyword layer  $G_{KK}$  for each of the 6 SW movies.

|     |         | LOCATIONS $G_{FF}$ |                        |         |         |    |                  |      |
|-----|---------|--------------------|------------------------|---------|---------|----|------------------|------|
|     |         | INFLUENCE SCORE    | BETWEENNESS CENTRALITY |         | DEGREE  |    | EIGEN CENTRALITY |      |
| SW1 | FBB     | 1,00               | FBB                    | 3250,47 | FBB     | 14 | FBB              | 1,00 |
|     | NGP     | 4,00               | FBCR                   | 2898,56 | TCH     | 10 | FBHOB            | 0,69 |
|     | TCH     | 4,67               | NSQC                   | 1656,26 | NGP     | 8  | TCH              | 0,48 |
|     | TDNS    | 6,67               | TDNS                   | 1649,20 | TDNS    | 8  | NGP              | 0,38 |
|     | FBCR    | 9,33               | NGP                    | 1448,21 | AHMR    | 8  | SCU              | 0,38 |
|     | AHMR    | 11,33              | NSMA                   | 1421,79 | NSCS    | 6  | FBH              | 0,34 |
|     | NSMA    | 11,67              | NFCS                   | 1416,31 | MSAVP   | 6  | FBMB             | 0,34 |
|     | SCU     | 12,33              | NSC                    | 1198,44 | MER     | 6  | NSCS             | 0,30 |
|     | NSC     | 13,00              | TCH                    | 1112,97 | NSMA    | 6  | FBCR             | 0,27 |
|     | NPTR    | 14,67              | AHMR                   | 1023,31 | NSC     | 6  | NFCS             | 0,25 |
| SW2 | CNSS    | 3,00               | SPACE                  | 3320,27 | SBPAB   | 10 | TCCE             | 1,00 |
|     | SBPAB   | 3,67               | CCD                    | 2503,83 | TCCE    | 8  | CNSS             | 0,94 |
|     | SPACE   | 4,00               | SBPAB                  | 2088,31 | CNSS    | 8  | GEA              | 0,93 |
|     | TCKLP   | 5,33               | CNSS                   | 1637,55 | GEA     | 8  | TCKLP            | 0,87 |
|     | CCD     | 6,00               | GLA                    | 1519,72 | SPACE   | 7  | TCFA             | 0,68 |
|     | TCCE    | 6,33               | TCKLP                  | 1198,69 | TCKLP   | 6  | SPACE            | 0,56 |
|     | GLA     | 8,00               | TDHMF                  | 1082,57 | CCD     | 6  | SBPAB            | 0,53 |
|     | THMF    | 10,00              | CMSC                   | 1061,00 | GLA     | 6  | TC               | 0,46 |
|     | GEA     | 10,67              | THMF                   | 1025,23 | TCFA    | 4  | CCD              | 0,38 |
|     | TC      | 15,33              | CJTCC                  | 1005,60 | TC      | 4  | THMF             | 0,27 |
| SW3 | PJTC    | 1,33               | PJTC                   | 4411,93 | MMCC    | 14 | PJTC             | 1,00 |
|     | MMCC    | 2,67               | ULP                    | 3739,91 | PJTC    | 12 | MFJT             | 0,90 |
|     | MCP     | 11,00              | ASH                    | 3128,93 | MFJT    | 6  | MMCC             | 0,81 |
|     | CSCMA   | 11,33              | MMCC                   | 2927,78 | MCP     | 6  | CSCMA            | 0,42 |
|     | ASH     | 12,00              | CO                     | 2575,75 | OBS     | 6  | CCPD             | 0,39 |
|     | OBS     | 13,00              | IDC                    | 2530,00 | ASH     | 6  | SC               | 0,38 |
|     | PJTC    | 13,00              | UCRGC                  | 2511,25 | LPCIRC  | 6  | SCC              | 0,33 |
|     | ULP     | 13,33              | OBS                    | 2461,83 | ULP     | 6  | CSACHO           | 0,28 |
|     | IDC     | 15,33              | BOOC                   | 2431,25 | CSCMA   | 4  | MCP              | 0,27 |
|     | LPN     | 17,00              | CJTH                   | 2351,25 | CCPD    | 4  | MLP              | 0,26 |
| SW4 | SIS     | 3,00               | SIS                    | 5427,41 | SIS     | 62 | LXFC             | 1,00 |
|     | LXFC    | 3,67               | DSCR                   | 2316,40 | LXFC    | 58 | SOTDS            | 0,99 |
|     | DSCR    | 6,33               | MFC                    | 2062,13 | SOTDS   | 56 | DVC              | 0,84 |
|     | SATDS   | 7,00               | DSH                    | 1134,68 | SATDS   | 50 | SATDS            | 0,84 |
|     | MFC     | 7,67               | MFGC                   | 1027,83 | DVC     | 42 | RLC              | 0,68 |
|     | MOWR    | 9,00               | TDW                    | 959,43  | RLC     | 36 | MOWR             | 0,68 |
|     | SOTDS   | 9,00               | TLH                    | 955,53  | MOWR    | 36 | SIS              | 0,64 |
|     | MFGC    | 10,33              | LXFC                   | 820,23  | DSCR    | 34 | LXWCT            | 0,61 |
|     | RLC     | 12,67              | DSCOR                  | 696,01  | MFC     | 32 | DSCR             | 0,48 |
|     | DSCOR   | 13,00              | SPACE,                 | 685,76  | LXWCT   | 28 | GLYWC            | 0,39 |
| SW5 | MHMFC   | 1,00               | MHMFC                  | 4794,51 | MHMFC   | 54 | MHMFC            | 1,00 |
|     | HB      | 4,67               | HRBMHD                 | 3148,16 | HB      | 22 | DVSDMCD          | 0,63 |
|     | HRBMHD  | 5,00               | CCC                    | 1063,52 | DVSDMCD | 20 | SIF              | 0,56 |
|     | HRBCC   | 8,00               | HRBCC                  | 1005,74 | HRBMHD  | 20 | HB               | 0,43 |
|     | BOCCWVD | 8,00               | CCLPMF                 | 958,96  | LSRLC   | 18 | BOCCWVD          | 0,40 |
|     | DVSDMCD | 8,33               | LXWC                   | 899,89  | HRBCC   | 16 | MFH              | 0,37 |
|     | SIF     | 9,33               | BOCCWVD                | 882,75  | CCC     | 16 | WSRTC            | 0,36 |
|     | HIPST   | 12,00              | HB                     | 596,33  | SIF     | 12 | LSRLC            | 0,34 |
|     | MFGAC   | 13,67              | RBMC                   | 570,07  | WSRTC   | 12 | HRBMHD           | 0,31 |
|     | LSRLC   | 16,33              | HIPST                  | 539,83  | HIPST   | 12 | MFSQ             | 0,28 |
| SW6 | MFC     | 1,00               | MFC                    | 1157,72 | MFC     | 14 | MFC              | 1,00 |
|     | DSCOR   | 2,67               | DSCOR                  | 885,89  | RSCB    | 14 | RSCB             | 0,95 |
|     | RSCB    | 3,67               | DSMDB                  | 809,48  | DSCOR   | 12 | DSCOR            | 0,74 |
|     | ETTR    | 4,67               | RTJPT                  | 776,48  | ETTR    | 12 | ETTR             | 0,73 |
|     | SKI     | 7,00               | SAT                    | 752,92  | SKI     | 10 | SKI              | 0,68 |
|     | SRF     | 7,67               | ETTR                   | 728,46  | FGB     | 10 | FGB              | 0,36 |
|     | DSMDB   | 8,33               | RSCB                   | 673,07  | SRF     | 6  | SRF              | 0,33 |
|     | FGB     | 9,00               | DSL                    | 667,95  | JTR     | 6  | JTR              | 0,33 |
|     | RTJPT   | 9,33               | SRF                    | 617,25  | FLSE    | 6  | FLSE             | 0,29 |
|     | JTR     | 9,67               | DS                     | 615,95  | BE      | 6  | BE               | 0,29 |

Table 11: Top 10 nodes sorted and their different metrics of the location layer  $G_{LL}$  for each of the 6 SW movies.

|                 |                | FACES $G_{FF}$         |                |         |                |                  |                |      |
|-----------------|----------------|------------------------|----------------|---------|----------------|------------------|----------------|------|
| INFLUENCE SCORE |                | BETWEENNESS CENTRALITY |                | DEGREE  |                | EIGEN CENTRALITY |                |      |
| SW1             | Q.GON          | 1,00                   | Q.GON          | 6911,14 | Q.GON          | 561              | Q.GON          | 1,00 |
|                 | A.DOPPELGANGER | 2,00                   | A.DOPPELGANGER | 4414,32 | A.DOPPELGANGER | 465              | A.DOPPELGANGER | 0,87 |
|                 | ANAKIN         | 3,00                   | ANAKIN         | 4020,27 | ANAKIN         | 442              | ANAKIN         | 0,79 |
|                 | J.JAR          | 4,00                   | J.JAR          | 3519,72 | J.JAR          | 424              | J.JAR          | 0,77 |
|                 | O.WAN          | 5,00                   | O.WAN          | 3097,53 | O.WAN          | 372              | O.WAN          | 0,71 |
|                 | PANAKA         | 6,33                   | SHMI           | 770,78  | PANAKA         | 244              | PANAKA         | 0,49 |
|                 | SHMI           | 6,67                   | PANAKA         | 711,55  | SHMI           | 215              | SHMI           | 0,38 |
|                 | PADME          | 8,33                   | SEBULBA        | 640,70  | PADME          | 205              | PADME          | 0,38 |
|                 | SEBULBA        | 9,67                   | PADME          | 589,85  | SEBULBA        | 154              | WATTO          | 0,20 |
|                 | PALPATINE      | 11,67                  | T.R.SPEAKER    | 452,96  | T.R.SPEAKER    | 121              | PALPATINE      | 0,19 |
| SW2             | ANAKIN         | 1,33                   | O.WAN          | 1819,97 | ANAKIN         | 193              | ANAKIN         | 1,00 |
|                 | O.WAN          | 2,00                   | ANAKIN         | 1131,10 | O.WAN          | 178              | AMIDALA        | 0,91 |
|                 | AMIDALA        | 2,67                   | AMIDALA        | 300,88  | AMIDALA        | 151              | O.WAN          | 0,81 |
|                 | M.WINDU        | 4,00                   | M.WINDU        | 115,45  | M.WINDU        | 85               | M.WINDU        | 0,50 |
|                 | YODA           | 5,67                   | YODA           | 99,56   | DOOKU          | 65               | DOOKU          | 0,38 |
|                 | DOOKU          | 6,67                   | P.FOLLOWER 1   | 59,77   | YODA           | 53               | YODA           | 0,33 |
|                 | J.FETT         | 8,67                   | J.JAR          | 36,74   | J.FETT         | 46               | J.FETT         | 0,24 |
|                 | B.FETT         | 9,67                   | Z.WESSEL       | 30,00   | B.FETT         | 45               | B.FETT         | 0,23 |
|                 | KI-ADI         | 10,33                  | KI-ADI         | 18,41   | NUTE           | 34               | C-3PO          | 0,19 |
|                 | P.FOLLOWER 1   | 11,67                  | DOOKU          | 15,28   | NUTE_FOLLOWER  | 33               | KI-ADI         | 0,18 |
| SW3             | ANAKIN         | 1,00                   | ANAKIN         | 803,00  | ANAKIN         | 149              | ANAKIN         | 1,00 |
|                 | O.WAN          | 2,00                   | O.WAN          | 792,84  | O.WAN          | 137              | O.WAN          | 0,92 |
|                 | PALPATINE      | 3,00                   | PALPATINE      | 477,11  | PALPATINE      | 98               | PALPATINE      | 0,72 |
|                 | YODA           | 4,00                   | YODA           | 343,71  | YODA           | 76               | YODA           | 0,48 |
|                 | B.B.ORGANA     | 5,33                   | B.B.ORGANA     | 99,52   | B.B.ORGANA     | 53               | M.WINDU        | 0,37 |
|                 | GRIEVOUS       | 7,00                   | N.GUARD        | 84,74   | M.WINDU        | 40               | B.B.ORGANA     | 0,36 |
|                 | M.WINDU        | 7,33                   | GRIEVOUS       | 31,85   | GRIEVOUS       | 36               | GRIEVOUS       | 0,30 |
|                 | N.GUARD        | 8,00                   | C.C.CODY       | 17,85   | M.AMEDDA       | 21               | N.GUARD        | 0,12 |
|                 | M.AMEDDA       | 9,00                   | CHEWBACCA      | 17,54   | CHEWBACCA      | 21               | M.AMEDDA       | 0,11 |
|                 | CHEWBACCA      | 9,33                   | M.AMEDDA       | 12,18   | N.GUARD        | 20               | CHEWBACCA      | 0,09 |
| SW4             | LUKE           | 1,00                   | LUKE           | 4974,91 | LUKE           | 248              | LUKE           | 1,00 |
|                 | H.SOLO         | 2,33                   | LEIA           | 3387,26 | H.SOLO         | 163              | H.SOLO         | 0,83 |
|                 | LEIA           | 3,33                   | H.SOLO         | 1649,13 | LEIA           | 156              | O.WAN          | 0,68 |
|                 | O.WAN          | 4,33                   | C-3PO          | 1259,98 | CHEWBACCA      | 124              | CHEWBACCA      | 0,66 |
|                 | CHEWBACCA      | 4,67                   | O.WAN          | 1106,46 | O.WAN          | 120              | LEIA           | 0,63 |
|                 | C-3PO          | 5,33                   | CHEWBACCA      | 680,36  | C-3PO          | 87               | C-3PO          | 0,40 |
|                 | DODGE          | 8,67                   | TARKIN         | 655,89  | DODGE          | 44               | DODGE          | 0,18 |
|                 | TARKIN         | 9,00                   | R.LEADER       | 181,44  | C.BARTENDER    | 36               | TARKIN         | 0,14 |
|                 | R.LEADER       | 9,00                   | R.PILOT        | 153,00  | R.LEADER       | 34               | R.OFFICER 1    | 0,14 |
|                 | C.BARTENDER    | 10,33                  | E.OFFICER 1    | 110,86  | R.OFFICER 1    | 34               | R.LEADER       | 0,12 |
| SW5             | LEIA           | 1,00                   | LEIA           | 1835,88 | LEIA           | 181              | LEIA           | 1,00 |
|                 | H.SOLO         | 2,67                   | LUKE           | 1233,35 | H.SOLO         | 127              | H.SOLO         | 0,86 |
|                 | LUKE           | 4,00                   | PIETT          | 1177,96 | CHEWBACCA      | 121              | CHEWBACCA      | 0,83 |
|                 | CHEWBACCA      | 4,00                   | H.SOLO         | 806,91  | LUKE           | 87               | C-3PO          | 0,56 |
|                 | L.TECHNICIAN   | 5,67                   | E.OFFICER 2    | 573,47  | L.TECHNICIAN   | 82               | L.TECHNICIAN   | 0,55 |
|                 | C-3PO          | 6,00                   | CHEWBACCA      | 176,85  | C-3PO          | 79               | LUKE           | 0,48 |
|                 | PIETT          | 8,00                   | L.TECHNICIAN   | 98,78   | RIEEKAN        | 36               | STORMTROOPER   | 0,20 |
|                 | RIEEKAN        | 8,33                   | C-3PO          | 90,03   | PIETT          | 35               | RIEEKAN        | 0,20 |
|                 | STORMTROOPER   | 10,33                  | E.OFFICER 3    | 62,98   | STORMTROOPER   | 32               | L.AIDE         | 0,17 |
|                 | R.OFFICER 2    | 11,33                  | RIEEKAN        | 51,90   | L.AIDE         | 27               | R.OFFICER 2    | 0,10 |
| SW6             | H.SOLO         | 1,67                   | LUKE           | 6441,79 | H.SOLO         | 264              | H.SOLO         | 1,00 |
|                 | LUKE           | 2,00                   | JERJERROD      | 5334,57 | LEIA           | 236              | LUKE           | 0,93 |
|                 | LEIA           | 3,00                   | H.SOLO         | 2746,38 | LUKE           | 234              | LEIA           | 0,92 |
|                 | C-3PO          | 4,67                   | LEIA           | 1989,77 | C-3PO          | 214              | CHEWBACCA      | 0,81 |
|                 | CHEWBACCA      | 5,33                   | C-3PO          | 1938,99 | CHEWBACCA      | 213              | C-3PO          | 0,75 |
|                 | LANDO          | 6,67                   | P.FOLLOWER 2   | 1573,46 | LANDO          | 123              | LANDO          | 0,41 |
|                 | P.FOLLOWER 2   | 7,67                   | CHEWBACCA      | 1524,11 | BIGGS          | 85               | J.MUSICIAN     | 0,30 |
|                 | BIGGS          | 9,00                   | LANDO          | 1253,12 | J.MUSICIAN     | 69               | P.FOLLOWER 2   | 0,20 |
|                 | J.MUSICIAN     | 10,67                  | E.OFFICER 4    | 965,00  | P.FOLLOWER 2   | 64               | BIB            | 0,19 |
|                 | EWOK           | 14,33                  | BIGGS          | 472,51  | EWOK           | 58               | BIGGS          | 0,18 |

Table 12: Top 10 nodes sorted and their different metrics of the face layer  $G_{FF}$  for each of the 6 SW movies.

|     |                        | CAPTIONS $G_{CaCa}$    |                        |            |                        |      |                        |      |  |
|-----|------------------------|------------------------|------------------------|------------|------------------------|------|------------------------|------|--|
|     | INFLUENCE SCORE        | BETWEENNESS CENTRALITY |                        |            | DEGREE                 |      | EIGEN CENTRALITY       |      |  |
| SW1 | a,black,jacket,wearing | 1,67                   | a,black,wearing,woman  | 606832,93  | a,black,jacket,wearing | 1244 | a,black,jacket,wearing | 1,00 |  |
|     | a,black,wearing,woman  | 2,00                   | a,shirt,wearing,white  | 582836,63  | a,black,wearing,woman  | 1198 | a,red,wearing,woman    | 0,99 |  |
|     | a,red,wearing,woman    | 3,33                   | a,black,jacket,wearing | 526258,21  | a,red,wearing,woman    | 1172 | a,black,wearing,woman  | 0,99 |  |
|     | a,red,shirt,wearing    | 4,33                   | a,red,shirt,wearing    | 464385,84  | a,red,shirt,wearing    | 1077 | a,jacket,red,wearing   | 0,88 |  |
|     | a,shirt,wearing,white  | 4,67                   | a,red,wearing,woman    | 407224,11  | a,shirt,wearing,white  | 1026 | a,red,shirt,wearing    | 0,87 |  |
|     | a,jacket,red,wearing   | 6,67                   | a,brown,shirt,wearing  | 375031,25  | a,jacket,red,wearing   | 1004 | a,black,man,wearing    | 0,78 |  |
|     | a,black,man,wearing    | 7,33                   | a,gray,shirt,wearing   | 326520,32  | a,black,man,wearing    | 912  | a,shirt,wearing,white  | 0,63 |  |
|     | a,blue,wearing,woman   | 10,33                  | a,cell,holding,phone   | 320486,19  | a,blue,wearing,woman   | 794  | a,man,red,wearing      | 0,63 |  |
|     | a,man,red,wearing      | 10,67                  | a,black,man,wearing    | 292449,91  | a,man,red,wearing      | 789  | a,blue,shirt,wearing   | 0,61 |  |
|     | a,gray,shirt,wearing   | 12,00                  | a,jacket,red,wearing   | 292245,97  | a,blue,shirt,wearing   | 756  | a,blue,wearing,woman   | 0,60 |  |
| SW2 | a,black,shirt,wearing  | 1,00                   | a,black,shirt,wearing  | 568323,98  | a,black,shirt,wearing  | 1186 | a,black,shirt,wearing  | 1,00 |  |
|     | a,shirt,wearing,white  | 2,33                   | a,shirt,wearing,white  | 421402,65  | a,shirt,wearing,white  | 1046 | a,black,jacket,wearing | 0,99 |  |
|     | a,black,jacket,wearing | 2,67                   | a,black,jacket,wearing | 310934,45  | a,black,jacket,wearing | 1014 | a,shirt,wearing,white  | 0,89 |  |
|     | a,black,man,wearing    | 4,00                   | a,black,man,wearing    | 242761,15  | a,black,man,wearing    | 901  | a,black,man,wearing    | 0,87 |  |
|     | a,black,wearing,woman  | 5,67                   | a,brown,shirt,wearing  | 236348,96  | a,black,wearing,woman  | 862  | a,black,wearing,woman  | 0,84 |  |
|     | a,wearing,white,woman  | 6,67                   | a,wearing,white,woman  | 232958,26  | a,red,shirt,wearing    | 807  | a,red,shirt,wearing    | 0,77 |  |
|     | a,brown,shirt,wearing  | 7,00                   | a,black,wearing,woman  | 229585,53  | a,wearing,white,woman  | 756  | a,wearing,white,woman  | 0,68 |  |
|     | a,red,shirt,wearing    | 7,00                   | a,brown,chair,wooden   | 204859,40  | a,brown,shirt,wearing  | 682  | a,brown,shirt,wearing  | 0,53 |  |
|     | a,brown,chair,wooden   | 9,33                   | a,red,shirt,wearing    | 204831,30  | a,blue,shirt,wearing   | 628  | a,man,red,wearing      | 0,53 |  |
|     | a,blue,shirt,wearing   | 10,33                  | a,blue,shirt,wearing   | 198192,49  | a,brown,chair,wooden   | 622  | a,brown,chair,wooden   | 0,51 |  |
| SW3 | a,black,shirt,wearing  | 1,00                   | a,black,shirt,wearing  | 472700,83  | a,black,shirt,wearing  | 1119 | a,black,shirt,wearing  | 1,00 |  |
|     | a,black,jacket,wearing | 2,33                   | a,shirt,wearing,white  | 413307,64  | a,black,jacket,wearing | 969  | a,black,jacket,wearing | 0,87 |  |
|     | a,shirt,wearing,white  | 3,00                   | a,black,jacket,wearing | 385062,37  | a,shirt,wearing,white  | 955  | a,black,man,wearing    | 0,86 |  |
|     | a,black,man,wearing    | 3,67                   | a,black,man,wearing    | 331940,26  | a,black,man,wearing    | 945  | a,shirt,wearing,white  | 0,81 |  |
|     | a,black,wearing,woman  | 5,00                   | a,black,wearing,woman  | 283309,35  | a,black,wearing,woman  | 842  | a,black,wearing,woman  | 0,77 |  |
|     | a,man,wearing,white    | 6,00                   | a,man,wearing,white    | 205703,12  | a,man,wearing,white    | 683  | a,man,wearing,white    | 0,57 |  |
|     | a,red,shirt,wearing    | 7,33                   | a,blue,shirt,wearing   | 204222,79  | a,red,shirt,wearing    | 582  | a,red,shirt,wearing    | 0,48 |  |
|     | a,blue,shirt,wearing   | 8,00                   | a,red,shirt,wearing    | 175432,63  | a,blue,shirt,wearing   | 520  | brown,hair,with,woman  | 0,41 |  |
|     | a,brown,shirt,wearing  | 9,67                   | a,hat,man,wearing      | 162296,90  | a,brown,shirt,wearing  | 500  | a,blue,shirt,wearing   | 0,40 |  |
|     | a,hat,man,wearing      | 11,33                  | a,brown,shirt,wearing  | 161450,97  | a,gray,shirt,wearing   | 477  | a,brown,shirt,wearing  | 0,40 |  |
| SW4 | a,shirt,wearing,white  | 1,00                   | a,shirt,wearing,white  | 3004281,15 | a,shirt,wearing,white  | 3958 | a,shirt,wearing,white  | 1,00 |  |
|     | a,man,wearing,white    | 2,00                   | a,man,wearing,white    | 893709,27  | a,man,wearing,white    | 2389 | a,man,wearing,white    | 0,67 |  |
|     | a,black,shirt,wearing  | 3,33                   | a,black,shirt,wearing  | 760984,31  | a,black,shirt,wearing  | 2061 | a,black,man,wearing    | 0,63 |  |
|     | a,black,man,wearing    | 4,33                   | a,black,jacket,wearing | 758577,11  | a,black,man,wearing    | 1991 | a,black,shirt,wearing  | 0,61 |  |
|     | a,red,shirt,wearing    | 5,00                   | a,red,shirt,wearing    | 589084,12  | a,red,shirt,wearing    | 1945 | a,red,shirt,wearing    | 0,58 |  |
|     | a,black,jacket,wearing | 5,33                   | a,black,man,wearing    | 549910,80  | a,black,jacket,wearing | 1902 | a,black,jacket,wearing | 0,53 |  |
|     | a,wearing,white,woman  | 7,33                   | and,red,sign,white     | 548465,73  | a,wearing,white,woman  | 1697 | a,wearing,white,woman  | 0,43 |  |
|     | a,helmet,man,wearing   | 9,67                   | a,wearing,white,woman  | 536963,20  | a,helmet,man,wearing   | 1387 | a,man,shirt,wearing    | 0,41 |  |
|     | and,bag,black,white    | 10,00                  | and,bag,black,white    | 453473,15  | and,bag,black,white    | 1336 | a,black,wearing,woman  | 0,41 |  |
|     | a,black,wearing,woman  | 11,33                  | and,black,sign,white   | 382991,34  | a,man,shirt,wearing    | 1288 | a,helmet,man,wearing   | 0,41 |  |
| SW5 | a,shirt,wearing,white  | 1,00                   | a,shirt,wearing,white  | 3004281,15 | a,shirt,wearing,white  | 3958 | a,shirt,wearing,white  | 1,00 |  |
|     | a,man,wearing,white    | 2,00                   | a,man,wearing,white    | 893709,27  | a,man,wearing,white    | 2389 | a,man,wearing,white    | 0,67 |  |
|     | a,black,shirt,wearing  | 3,33                   | a,black,shirt,wearing  | 760984,31  | a,black,shirt,wearing  | 2061 | a,black,man,wearing    | 0,63 |  |
|     | a,black,man,wearing    | 4,33                   | a,black,jacket,wearing | 758577,11  | a,black,man,wearing    | 1991 | a,black,shirt,wearing  | 0,61 |  |
|     | a,red,shirt,wearing    | 5,00                   | a,red,shirt,wearing    | 589084,12  | a,red,shirt,wearing    | 1945 | a,red,shirt,wearing    | 0,58 |  |
|     | a,black,jacket,wearing | 5,33                   | a,black,man,wearing    | 549910,80  | a,black,jacket,wearing | 1902 | a,black,jacket,wearing | 0,53 |  |
|     | a,wearing,white,woman  | 7,33                   | and,red,sign,white     | 548465,73  | a,wearing,white,woman  | 1697 | a,wearing,white,woman  | 0,43 |  |
|     | a,helmet,man,wearing   | 9,67                   | a,wearing,white,woman  | 536963,20  | a,helmet,man,wearing   | 1387 | a,man,shirt,wearing    | 0,41 |  |
|     | and,bag,black,white    | 10,00                  | and,bag,black,white    | 453473,15  | and,bag,black,white    | 1336 | a,black,wearing,woman  | 0,41 |  |
|     | a,black,wearing,woman  | 11,33                  | and,black,sign,white   | 382991,34  | a,man,shirt,wearing    | 1288 | a,helmet,man,wearing   | 0,41 |  |
| SW6 | a,shirt,wearing,white  | 1,33                   | and,red,sign,white     | 498416,92  | a,shirt,wearing,white  | 770  | a,shirt,wearing,white  | 1,00 |  |
|     | a,black,jacket,wearing | 3,00                   | a,shirt,wearing,white  | 392339,83  | a,black,jacket,wearing | 688  | a,man,wearing,white    | 0,99 |  |
|     | a,man,wearing,white    | 3,33                   | a,black,shirt,wearing  | 309495,34  | a,man,wearing,white    | 652  | a,black,jacket,wearing | 0,88 |  |
|     | and,red,sign,white     | 4,33                   | a,black,jacket,wearing | 273076,24  | and,red,sign,white     | 616  | a,black,man,wearing    | 0,79 |  |
|     | a,black,shirt,wearing  | 4,33                   | a,man,wearing,white    | 236449,76  | a,black,shirt,wearing  | 610  | a,black,shirt,wearing  | 0,79 |  |
|     | a,black,man,wearing    | 5,67                   | a,hat,man,wearing      | 215331,57  | a,black,man,wearing    | 599  | a,man,shirt,wearing    | 0,67 |  |
|     | a,hat,man,wearing      | 7,33                   | a,black,man,wearing    | 194997,54  | a,hat,man,wearing      | 508  | a,green,shirt,wearing  | 0,60 |  |
|     | a,green,shirt,wearing  | 7,67                   | a,green,shirt,wearing  | 153338,74  | a,green,shirt,wearing  | 503  | and,red,sign,white     | 0,58 |  |
|     | a,black,wearing,woman  | 9,67                   | a,brown,chair,wooden   | 136476,23  | a,black,wearing,woman  | 410  | a,hat,man,wearing      | 0,58 |  |
|     | a,man,shirt,wearing    | 9,67                   | a,black,wearing,woman  | 132225,37  | a,man,shirt,wearing    | 398  | a,black,wearing,woman  | 0,53 |  |

Table 13: Top 10 nodes sorted and their different metrics of the caption layer  $G_{CaCa}$  for each of the 6 SW movies.

| MULTILAYER, ALL LAYERS $\mathbb{G}$ |                        |            |                        |                        |            |            |                        |            |                  |                        |            |      |
|-------------------------------------|------------------------|------------|------------------------|------------------------|------------|------------|------------------------|------------|------------------|------------------------|------------|------|
| INFLUENCE SCORE                     |                        |            | BETWEENNESS CENTRALITY |                        |            | DEGREE     |                        |            | EIGEN CENTRALITY |                        |            |      |
| SW1                                 | Q.GON                  | $G_{FF}$   | 1,00                   | Q.GON                  | $G_{FF}$   | 2029399,14 | Q.GON                  | $G_{FF}$   | 5200             | Q.GON                  | $G_{FF}$   | 1,00 |
|                                     | A.DOPPELGANGER         | $G_{FF}$   | 2,33                   | ANAKIN                 | $G_{FF}$   | 1086600,09 | A.DOPPELGANGER         | $G_{FF}$   | 4036             | A.DOPPELGANGER         | $G_{FF}$   | 0,83 |
|                                     | ANAKIN                 | $G_{FF}$   | 2,67                   | A.DOPPELGANGER         | $G_{FF}$   | 1020904,25 | ANAKIN                 | $G_{FF}$   | 3602             | ANAKIN                 | $G_{FF}$   | 0,72 |
|                                     | O.WAN                  | $G_{FF}$   | 4,00                   | O.WAN                  | $G_{FF}$   | 627969,35  | O.WAN                  | $G_{FF}$   | 3345             | O.WAN                  | $G_{FF}$   | 0,71 |
|                                     | Q.GON                  | $G_{CC}$   | 5,33                   | Q.GON                  | $G_{CC}$   | 619019,91  | Q.GON                  | $G_{CC}$   | 3153             | J.JAR                  | $G_{FF}$   | 0,66 |
|                                     | J.JAR                  | $G_{FF}$   | 5,67                   | J.JAR                  | $G_{FF}$   | 588256,19  | J.JAR                  | $G_{FF}$   | 3102             | Q.GON                  | $G_{CC}$   | 0,64 |
|                                     | ANAKIN                 | $G_{CC}$   | 7,00                   | ANAKIN                 | $G_{CC}$   | 379957,94  | ANAKIN                 | $G_{CC}$   | 2380             | ANAKIN                 | $G_{CC}$   | 0,47 |
|                                     | a,black,jacket,wearing | $G_{CaCa}$ | 9,33                   | a,black,wearing,woman  | $G_{CaCa}$ | 218214,03  | a,black,jacket,wearing | $G_{CaCa}$ | 1903             | PANAKA                 | $G_{FF}$   | 0,44 |
|                                     | a,black,wearing,woman  | $G_{CaCa}$ | 9,67                   | time                   | $G_{KK}$   | 211695,78  | PANAKA                 | $G_{FF}$   | 1850             | a,black,jacket,wearing | $G_{CaCa}$ | 0,44 |
|                                     | J.JAR                  | $G_{CC}$   | 11,67                  | O.WAN                  | $G_{CC}$   | 170415,00  | a,black,wearing,woman  | $G_{CaCa}$ | 1749             | J.JAR                  | $G_{CC}$   | 0,39 |
| SW2                                 | ANAKIN                 | $G_{FF}$   | 1,67                   | ANAKIN                 | $G_{FF}$   | 984959,77  | master                 | $G_{KK}$   | 3483             | master                 | $G_{KK}$   | 1,00 |
|                                     | AMIDALA                | $G_{FF}$   | 3,00                   | O.WAN                  | $G_{FF}$   | 764598,12  | ANAKIN                 | $G_{FF}$   | 3286             | ANAKIN                 | $G_{FF}$   | 0,85 |
|                                     | master                 | $G_{KK}$   | 3,33                   | AMIDALA                | $G_{FF}$   | 628350,88  | AMIDALA                | $G_{FF}$   | 2930             | AMIDALA                | $G_{FF}$   | 0,83 |
|                                     | O.WAN                  | $G_{FF}$   | 4,33                   | a,black,shirt,wearing  | $G_{CaCa}$ | 235025,43  | jedi                   | $G_{KK}$   | 2882             | jedi                   | $G_{KK}$   | 0,79 |
|                                     | a,black,shirt,wearing  | $G_{CaCa}$ | 6,00                   | a,black,jacket,wearing | $G_{CaCa}$ | 206061,93  | O.WAN                  | $G_{FF}$   | 2421             | continuing             | $G_{KK}$   | 0,62 |
|                                     | jedi                   | $G_{KK}$   | 6,33                   | a,shirt,wearing,white  | $G_{CaCa}$ | 191459,60  | continuing             | $G_{KK}$   | 2319             | O.WAN                  | $G_{FF}$   | 0,55 |
|                                     | continuing             | $G_{KK}$   | 8,00                   | a,black,wearing,woman  | $G_{CaCa}$ | 162292,32  | a,black,shirt,wearing  | $G_{CaCa}$ | 1781             | a,black,shirt,wearing  | $G_{CaCa}$ | 0,52 |
|                                     | a,black,jacket,wearing | $G_{CaCa}$ | 8,33                   | master                 | $G_{KK}$   | 151899,48  | PADME                  | $G_{CC}$   | 1710             | a,red,shirt,wearing    | $G_{CaCa}$ | 0,46 |
|                                     | PADME                  | $G_{CC}$   | 9,67                   | PADME                  | $G_{CC}$   | 125297,45  | ANAKIN                 | $G_{CC}$   | 1584             | a,black,wearing,woman  | $G_{CaCa}$ | 0,44 |
|                                     | a,black,wearing,woman  | $G_{CaCa}$ | 10,33                  | a,black,man,wearing    | $G_{CaCa}$ | 118643,29  | a,black,jacket,wearing | $G_{CaCa}$ | 1537             | a,black,jacket,wearing | $G_{CaCa}$ | 0,43 |
| SW3                                 | ANAKIN                 | $G_{FF}$   | 2,33                   | ANAKIN                 | $G_{FF}$   | 1713902,24 | anakin                 | $G_{KK}$   | 4914             | anakin                 | $G_{KK}$   | 1,00 |
|                                     | O.WAN                  | $G_{FF}$   | 3,33                   | O.WAN                  | $G_{FF}$   | 1129859,28 | jedi                   | $G_{KK}$   | 4174             | jedi                   | $G_{KK}$   | 0,82 |
|                                     | jedi                   | $G_{KK}$   | 5,00                   | PALPATINE              | $G_{FF}$   | 339138,75  | ANAKIN                 | $G_{FF}$   | 3702             | ANAKIN                 | $G_{FF}$   | 0,58 |
|                                     | anakin                 | $G_{KK}$   | 5,33                   | YODA                   | $G_{FF}$   | 241545,04  | O.WAN                  | $G_{FF}$   | 3037             | O.WAN                  | $G_{FF}$   | 0,51 |
|                                     | a,black,shirt,wearing  | $G_{CaCa}$ | 6,67                   | a,black,shirt,wearing  | $G_{CaCa}$ | 219255,32  | master                 | $G_{KK}$   | 2638             | master                 | $G_{KK}$   | 0,50 |
|                                     | YODA                   | $G_{FF}$   | 8,00                   | a,black,man,wearing    | $G_{CaCa}$ | 175916,21  | anakin                 | $G_{KK}$   | 2574             | anakin                 | $G_{KK}$   | 0,50 |
|                                     | a,black,jacket,wearing | $G_{CaCa}$ | 8,33                   | a,black,jacket,wearing | $G_{CaCa}$ | 171538,03  | council                | $G_{KK}$   | 1965             | a,black,shirt,wearing  | $G_{CaCa}$ | 0,46 |
|                                     | master                 | $G_{KK}$   | 8,67                   | a,shirt,wearing,white  | $G_{CaCa}$ | 141830,21  | a,black,shirt,wearing  | $G_{CaCa}$ | 1884             | council                | $G_{KK}$   | 0,45 |
|                                     | a,black,man,wearing    | $G_{CaCa}$ | 9,33                   | a,black,wearing,woman  | $G_{CaCa}$ | 118598,62  | a,black,jacket,wearing | $G_{CaCa}$ | 1702             | a,black,jacket,wearing | $G_{CaCa}$ | 0,40 |
|                                     | anakin                 | $G_{KK}$   | 11,67                  | a,man,wearing,white    | $G_{CaCa}$ | 82661,55   | YODA                   | $G_{FF}$   | 1620             | YODA                   | $G_{FF}$   | 0,40 |
| SW4                                 | a,shirt,wearing,white  | $G_{CaCa}$ | 1,33                   | LUKE                   | $G_{FF}$   | 2260545,29 | a,shirt,wearing,white  | $G_{CaCa}$ | 5051             | a,shirt,wearing,white  | $G_{CaCa}$ | 1,00 |
|                                     | LUKE                   | $G_{FF}$   | 1,67                   | a,shirt,wearing,white  | $G_{CaCa}$ | 2230699,19 | LUKE                   | $G_{FF}$   | 4687             | LUKE                   | $G_{FF}$   | 0,89 |
|                                     | a,man,wearing,white    | $G_{CaCa}$ | 3,00                   | a,man,wearing,white    | $G_{CaCa}$ | 721047,58  | a,man,wearing,white    | $G_{CaCa}$ | 3197             | a,man,wearing,white    | $G_{CaCa}$ | 0,69 |
|                                     | LEIA                   | $G_{FF}$   | 5,33                   | a,black,jacket,wearing | $G_{CaCa}$ | 663966,32  | LEIA                   | $G_{FF}$   | 2614             | luke                   | $G_{KK}$   | 0,56 |
|                                     | a,black,shirt,wearing  | $G_{CaCa}$ | 5,67                   | LEIA                   | $G_{FF}$   | 644340,46  | a,black,shirt,wearing  | $G_{CaCa}$ | 2575             | a,black,man,wearing    | $G_{CaCa}$ | 0,56 |
|                                     | a,black,man,wearing    | $G_{CaCa}$ | 7,00                   | a,black,shirt,wearing  | $G_{CaCa}$ | 642710,61  | a,black,man,wearing    | $G_{CaCa}$ | 2567             | a,black,shirt,wearing  | $G_{CaCa}$ | 0,54 |
|                                     | a,black,jacket,wearing | $G_{CaCa}$ | 7,67                   | C-3PO                  | $G_{FF}$   | 541632,38  | a,red,shirt,wearing    | $G_{CaCa}$ | 2373             | LEIA                   | $G_{FF}$   | 0,54 |
|                                     | a,red,shirt,wearing    | $G_{CaCa}$ | 8,33                   | LUKE                   | $G_{CC}$   | 505434,77  | luke                   | $G_{KK}$   | 2352             | H.SOLO                 | $G_{FF}$   | 0,49 |
|                                     | LUKE                   | $G_{CC}$   | 10,00                  | a,red,shirt,wearing    | $G_{CaCa}$ | 497110,15  | a,black,jacket,wearing | $G_{CaCa}$ | 2318             | a,red,shirt,wearing    | $G_{CaCa}$ | 0,49 |
|                                     | H.SOLO                 | $G_{FF}$   | 10,33                  | a,black,man,wearing    | $G_{CaCa}$ | 489496,99  | LUKE                   | $G_{CC}$   | 2297             | a,black,jacket,wearing | $G_{CaCa}$ | 0,45 |
| SW5                                 | LEIA                   | $G_{FF}$   | 1,00                   | LEIA                   | $G_{FF}$   | 895766,00  | LEIA                   | $G_{FF}$   | 2916             | LEIA                   | $G_{FF}$   | 1,00 |
|                                     | H.SOLO                 | $G_{FF}$   | 3,00                   | LUKE                   | $G_{FF}$   | 852321,96  | a,shirt,wearing,white  | $G_{CaCa}$ | 2358             | a,shirt,wearing,white  | $G_{CaCa}$ | 0,88 |
|                                     | a,shirt,wearing,white  | $G_{CaCa}$ | 3,00                   | H.SOLO                 | $G_{FF}$   | 600429,56  | H.SOLO                 | $G_{FF}$   | 2275             | H.SOLO                 | $G_{FF}$   | 0,79 |
|                                     | a,black,shirt,wearing  | $G_{CaCa}$ | 4,33                   | a,black,shirt,wearing  | $G_{CaCa}$ | 577312,57  | comlink                | $G_{KK}$   | 2274             | a,black,shirt,wearing  | $G_{CaCa}$ | 0,74 |
|                                     | LUKE                   | $G_{FF}$   | 6,00                   | a,shirt,wearing,white  | $G_{CaCa}$ | 520796,12  | a,black,shirt,wearing  | $G_{CaCa}$ | 2121             | comlink                | $G_{KK}$   | 0,70 |
|                                     | a,black,man,wearing    | $G_{CaCa}$ | 7,00                   | a,black,jacket,wearing | $G_{CaCa}$ | 469996,82  | LUKE                   | $G_{FF}$   | 1999             | a,wearing,white,woman  | $G_{CaCa}$ | 0,64 |
|                                     | a,black,jacket,wearing | $G_{CaCa}$ | 7,33                   | a,black,man,wearing    | $G_{CaCa}$ | 445919,52  | a,black,man,wearing    | $G_{CaCa}$ | 1944             | a,black,man,wearing    | $G_{CaCa}$ | 0,64 |
|                                     | a,wearing,white,woman  | $G_{CaCa}$ | 9,33                   | a,man,wearing,white    | $G_{CaCa}$ | 341494,92  | a,black,jacket,wearing | $G_{CaCa}$ | 1932             | a,black,jacket,wearing | $G_{CaCa}$ | 0,62 |
|                                     | comlink                | $G_{KK}$   | 9,67                   | a,black,wearing,woman  | $G_{CaCa}$ | 323610,40  | a,wearing,white,woman  | $G_{CaCa}$ | 1680             | CHEWBACCA              | $G_{FF}$   | 0,61 |
|                                     | a,black,wearing,woman  | $G_{CaCa}$ | 10,00                  | CHEWBACCA              | $G_{FF}$   | 285879,65  | a,black,wearing,woman  | $G_{CaCa}$ | 1664             | LUKE                   | $G_{FF}$   | 0,59 |
| SW6                                 | LUKE                   | $G_{FF}$   | 1,00                   | LUKE                   | $G_{FF}$   | 758356,97  | LUKE                   | $G_{FF}$   | 2629             | LUKE                   | $G_{FF}$   | 1,00 |
|                                     | H.SOLO                 | $G_{FF}$   | 2,00                   | H.SOLO                 | $G_{FF}$   | 404462,48  | H.SOLO                 | $G_{FF}$   | 2271             | H.SOLO                 | $G_{FF}$   | 0,91 |
|                                     | LEIA                   | $G_{FF}$   | 3,00                   | LEIA                   | $G_{FF}$   | 303244,39  | LEIA                   | $G_{FF}$   | 1918             | LEIA                   | $G_{FF}$   | 0,81 |
|                                     | H.SOLO                 | $G_{CC}$   | 5,33                   | H.SOLO                 | $G_{CC}$   | 297703,51  | luke                   | $G_{KK}$   | 1892             | luke                   | $G_{KK}$   | 0,74 |
|                                     | luke                   | $G_{KK}$   | 6,33                   | LANDO                  | $G_{FF}$   | 232471,55  | H.SOLO                 | $G_{CC}$   | 1862             | C-3PO                  | $G_{FF}$   | 0,68 |
|                                     | C-3PO                  | $G_{CC}$   | 6,67                   | C-3PO                  | $G_{CC}$   | 202008,30  | C-3PO                  | $G_{CC}$   | 1575             | CHEWBACCA              | $G_{FF}$   | 0,65 |
|                                     | C-3PO                  | $G_{FF}$   | 7,67                   | LANDO                  | $G_{CC}$   | 168427,88  | artoo                  | $G_{KK}$   | 1522             | H.SOLO                 | $G_{CC}$   | 0,64 |
|                                     | CHEWBACCA              | $G_{FF}$   | 10,33                  | a,man,wearing,white    | $G_{CaCa}$ | 161921,52  | C-3PO                  | $G_{FF}$   | 1509             | C-3PO                  | $G_{CC}$   | 0,60 |
|                                     | a,shirt,wearing,white  | $G_{CaCa}$ | 11,67                  | shield                 | $G_{KK}$   | 157559,21  | CHEWBACCA              | $G_{FF}$   | 1449             | artoo                  | $G_{KK}$   | 0,52 |
|                                     | LANDO                  | $G_{FF}$   | 12,00                  | C-3PO                  | $G_{FF}$   | 157172,38  | LUKE                   | $G_{CC}$   | 1297             | a,shirt,wearing,white  | $G_{CaCa}$ | 0,48 |

Table 14: Top 10 nodes sorted and their different metrics of the multilayer network with all layers  $\mathbb{G}$  for each of the 6 SW movies.



| MULTILAYER, WITHOUT CAPTIONS $G'$ |                |          |                        |                       |          |          |                |          |                  |                |          |          |
|-----------------------------------|----------------|----------|------------------------|-----------------------|----------|----------|----------------|----------|------------------|----------------|----------|----------|
| INFLUENCE SCORE                   |                |          | BETWEENNESS CENTRALITY |                       |          |          | DEGREE         |          | EIGEN CENTRALITY |                |          |          |
| SW1                               | Q.GON          | $G_{FF}$ | 1,00                   | Q.GON                 | $G_{FF}$ | 22399,29 | Q.GON          | $G_{FF}$ | 463              | Q.GON          | $G_{FF}$ | 1,00     |
|                                   | A.DOPPELGANGER | $G_{FF}$ | 2,33                   | A.DOPPELGANGER        | $G_{FF}$ | 18254,37 | A.DOPPELGANGER | $G_{FF}$ | 412              | ANAKIN         | $G_{FF}$ | 0,92     |
|                                   | ANAKIN         | $G_{FF}$ | 2,67                   | ANAKIN                | $G_{FF}$ | 16702,12 | ANAKIN         | $G_{FF}$ | 404              | A.DOPPELGANGER | $G_{FF}$ | 0,90     |
|                                   | J.JAR          | $G_{FF}$ | 4,33                   | O.WAN                 | $G_{FF}$ | 11760,71 | J.JAR          | $G_{FF}$ | 370              | J.JAR          | $G_{FF}$ | 0,89     |
|                                   | O.WAN          | $G_{FF}$ | 4,67                   | J.JAR                 | $G_{FF}$ | 11071,31 | O.WAN          | $G_{FF}$ | 360              | O.WAN          | $G_{FF}$ | 0,84     |
|                                   | Q.GON          | $G_{CC}$ | 6,00                   | Q.GON                 | $G_{CC}$ | 8245,34  | Q.GON          | $G_{CC}$ | 311              | Q.GON          | $G_{CC}$ | 0,76     |
|                                   | ANAKIN         | $G_{CC}$ | 7,00                   | ANAKIN                | $G_{CC}$ | 4543,54  | ANAKIN         | $G_{CC}$ | 258              | ANAKIN         | $G_{CC}$ | 0,67     |
|                                   | PANAKA         | $G_{FF}$ | 8,00                   | PANAKA                | $G_{FF}$ | 3096,58  | PANAKA         | $G_{FF}$ | 236              | PANAKA         | $G_{FF}$ | 0,58     |
|                                   | SHMI           | $G_{FF}$ | 9,00                   | SHMI                  | $G_{FF}$ | 2922,48  | SHMI           | $G_{FF}$ | 221              | SHMI           | $G_{FF}$ | 0,57     |
|                                   | PADME          | $G_{FF}$ | 10,33                  | J.JAR                 | $G_{CC}$ | 2782,90  | PADME          | $G_{FF}$ | 215              | PADME          | $G_{FF}$ | 0,55     |
| SW2                               | ANAKIN         | $G_{FF}$ | 1,00                   | ANAKIN                | $G_{FF}$ | 15740,37 | ANAKIN         | $G_{FF}$ | 268              | ANAKIN         | $G_{FF}$ | 1,00     |
|                                   | O.WAN          | $G_{FF}$ | 2,67                   | O.WAN                 | $G_{FF}$ | 15032,85 | O.WAN          | $G_{FF}$ | 243              | AMIDALA        | $G_{FF}$ | 0,95     |
|                                   | AMIDALA        | $G_{FF}$ | 2,67                   | AMIDALA               | $G_{FF}$ | 8973,43  | AMIDALA        | $G_{FF}$ | 236              | PADME          | $G_{CC}$ | 0,93     |
|                                   | PADME          | $G_{CC}$ | 3,67                   | PADME                 | $G_{CC}$ | 4979,84  | PADME          | $G_{CC}$ | 210              | O.WAN          | $G_{FF}$ | 0,91     |
|                                   | ANAKIN         | $G_{CC}$ | 5,00                   | ANAKIN                | $G_{CC}$ | 3140,45  | ANAKIN         | $G_{CC}$ | 182              | ANAKIN         | $G_{CC}$ | 0,82     |
|                                   | O.WAN          | $G_{CC}$ | 6,67                   | YODA                  | $G_{FF}$ | 2251,74  | O.WAN          | $G_{CC}$ | 139              | O.WAN          | $G_{CC}$ | 0,71     |
|                                   | M.WINDU        | $G_{FF}$ | 7,33                   | M.WINDU               | $G_{FF}$ | 1444,81  | M.WINDU        | $G_{FF}$ | 127              | jedi           | $G_{KK}$ | 0,70     |
|                                   | YODA           | $G_{FF}$ | 9,00                   | O.WAN                 | $G_{CC}$ | 1342,22  | jedi           | $G_{KK}$ | 126              | M.WINDU        | $G_{FF}$ | 0,67     |
|                                   | jedi           | $G_{KK}$ | 9,00                   | THG                   | $G_{LL}$ | 1088,01  | master         | $G_{KK}$ | 121              | master         | $G_{KK}$ | 0,67     |
|                                   | master         | $G_{KK}$ | 10,33                  | SP                    | $G_{LL}$ | 1083,56  | YODA           | $G_{FF}$ | 109              | senator        | $G_{KK}$ | 0,61     |
| SW3                               | O.WAN          | $G_{FF}$ | 1,00                   | O.WAN                 | $G_{FF}$ | 21232,20 | O.WAN          | $G_{FF}$ | 265              | O.WAN          | $G_{FF}$ | 21232,20 |
|                                   | ANAKIN         | $G_{FF}$ | 2,00                   | ANAKIN                | $G_{FF}$ | 20436,79 | ANAKIN         | $G_{FF}$ | 243              | ANAKIN         | $G_{FF}$ | 20436,79 |
|                                   | YODA           | $G_{FF}$ | 3,00                   | YODA                  | $G_{FF}$ | 8650,24  | YODA           | $G_{FF}$ | 216              | YODA           | $G_{FF}$ | 8650,24  |
|                                   | PALPATINE      | $G_{FF}$ | 5,33                   | PALPATINE             | $G_{FF}$ | 5738,50  | ANAKIN         | $G_{CC}$ | 166              | PALPATINE      | $G_{FF}$ | 5738,50  |
|                                   | B.B.ORGANA     | $G_{FF}$ | 5,33                   | B.B.ORGANA            | $G_{FF}$ | 3400,49  | O.WAN          | $G_{CC}$ | 163              | B.B.ORGANA     | $G_{FF}$ | 3400,49  |
|                                   | O.WAN          | $G_{CC}$ | 5,67                   | O.WAN                 | $G_{CC}$ | 2625,97  | B.B.ORGANA     | $G_{FF}$ | 152              | O.WAN          | $G_{CC}$ | 2625,97  |
|                                   | ANAKIN         | $G_{CC}$ | 6,67                   | DVQSD                 | $G_{LL}$ | 2304,85  | PALPATINE      | $G_{CC}$ | 136              | DVQSD          | $G_{LL}$ | 2304,85  |
|                                   | DVQSD          | $G_{LL}$ | 9,67                   | ANAKIN                | $G_{CC}$ | 2267,87  | PALPATINE      | $G_{FF}$ | 130              | ANAKIN         | $G_{CC}$ | 2267,87  |
|                                   | M.WINDU        | $G_{FF}$ | 11,00                  | MMCC                  | $G_{LL}$ | 2228,06  | PADME          | $G_{CC}$ | 112              | MMCC           | $G_{LL}$ | 2228,06  |
|                                   | PALPATINE      | $G_{CC}$ | 11,00                  | M.WINDU               | $G_{FF}$ | 1826,07  | MLP            | $G_{LL}$ | 111              | M.WINDU        | $G_{FF}$ | 1826,07  |
| SW4                               | LUKE           | $G_{FF}$ | 1,00                   | LUKE                  | $G_{FF}$ | 26723,22 | LUKE           | $G_{FF}$ | 282              | LUKE           | $G_{FF}$ | 1,00     |
|                                   | LEIA           | $G_{FF}$ | 2,33                   | LEIA                  | $G_{FF}$ | 15115,28 | LEIA           | $G_{FF}$ | 224              | LUKE           | $G_{CC}$ | 0,91     |
|                                   | LUKE           | $G_{CC}$ | 2,67                   | LUKE                  | $G_{CC}$ | 10156,06 | LUKE           | $G_{CC}$ | 220              | LEIA           | $G_{FF}$ | 0,86     |
|                                   | H.SOLO         | $G_{FF}$ | 4,00                   | H.SOLO                | $G_{FF}$ | 10118,03 | H.SOLO         | $G_{FF}$ | 204              | H.SOLO         | $G_{FF}$ | 0,81     |
|                                   | C-3PO          | $G_{FF}$ | 5,00                   | C-3PO                 | $G_{FF}$ | 7509,04  | C-3PO          | $G_{FF}$ | 163              | C-3PO          | $G_{FF}$ | 0,71     |
|                                   | C-3PO          | $G_{CC}$ | 6,67                   | DSCR                  | $G_{LL}$ | 7109,82  | C-3PO          | $G_{CC}$ | 151              | C-3PO          | $G_{CC}$ | 0,68     |
|                                   | O.WAN          | $G_{FF}$ | 8,00                   | O.WAN                 | $G_{FF}$ | 5943,19  | CHEWBACCA      | $G_{FF}$ | 147              | H.SOLO         | $G_{CC}$ | 0,62     |
|                                   | CHEWBACCA      | $G_{FF}$ | 8,67                   | C-3PO                 | $G_{CC}$ | 5761,45  | O.WAN          | $G_{FF}$ | 140              | CHEWBACCA      | $G_{FF}$ | 0,61     |
|                                   | H.SOLO         | $G_{CC}$ | 10,00                  | MFC                   | $G_{LL}$ | 5275,11  | H.SOLO         | $G_{CC}$ | 138              | O.WAN          | $G_{FF}$ | 0,59     |
|                                   | MFC            | $G_{LL}$ | 10,67                  | SIS                   | $G_{LL}$ | 5229,49  | TARKIN         | $G_{FF}$ | 115              | DODGE          | $G_{FF}$ | 0,55     |
| SW5                               | LEIA           | $G_{FF}$ | 1,00                   | LEIA                  | $G_{FF}$ | 13954,65 | LEIA           | $G_{FF}$ | 196              | LEIA           | $G_{FF}$ | 1,00     |
|                                   | LUKE           | $G_{FF}$ | 2,00                   | LUKE                  | $G_{FF}$ | 13567,44 | LUKE           | $G_{FF}$ | 164              | LUKE           | $G_{FF}$ | 0,91     |
|                                   | H.SOLO         | $G_{FF}$ | 3,67                   | MHSMFC                | $G_{LL}$ | 11933,93 | H.SOLO         | $G_{FF}$ | 144              | H.SOLO         | $G_{CC}$ | 0,83     |
|                                   | H.SOLO         | $G_{CC}$ | 5,33                   | H.SOLO                | $G_{FF}$ | 6788,29  | MHSMFC         | $G_{LL}$ | 126              | H.SOLO         | $G_{FF}$ | 0,81     |
|                                   | MHSMFC         | $G_{LL}$ | 6,33                   | HRBCC                 | $G_{LL}$ | 5609,66  | H.SOLO         | $G_{CC}$ | 120              | LUKE           | $G_{CC}$ | 0,75     |
|                                   | HRBCC          | $G_{LL}$ | 6,67                   | PIETT                 | $G_{FF}$ | 5342,43  | CHEWBACCA      | $G_{FF}$ | 115              | CHEWBACCA      | $G_{FF}$ | 0,74     |
|                                   | CHEWBACCA      | $G_{FF}$ | 7,00                   | HRBMHSD               | $G_{LL}$ | 3824,01  | HRBCC          | $G_{LL}$ | 111              | C-3PO          | $G_{FF}$ | 0,69     |
|                                   | LUKE           | $G_{CC}$ | 8,67                   | H.SOLO                | $G_{CC}$ | 3759,26  | YODA           | $G_{FF}$ | 103              | HRBCC          | $G_{LL}$ | 0,68     |
|                                   | C-3PO          | $G_{FF}$ | 10,33                  | CHEWBACCA             | $G_{FF}$ | 2651,96  | LUKE           | $G_{CC}$ | 101              | LEIA           | $G_{CC}$ | 0,68     |
|                                   | YODA           | $G_{FF}$ | 10,67                  | EMPIRE OFFICER 1499.0 | $G_{FF}$ | 2317,74  | RIEKAN         | $G_{FF}$ | 101              | RIEKAN         | $G_{FF}$ | 0,67     |
| SW6                               | H.SOLO         | $G_{FF}$ | 1,33                   | LUKE                  | $G_{FF}$ | 14696,03 | H.SOLO         | $G_{FF}$ | 272              | H.SOLO         | $G_{FF}$ | 1,00     |
|                                   | LUKE           | $G_{FF}$ | 2,67                   | H.SOLO                | $G_{FF}$ | 8672,05  | LUKE           | $G_{FF}$ | 266              | C-3PO          | $G_{FF}$ | 0,97     |
|                                   | LEIA           | $G_{FF}$ | 3,00                   | LEIA                  | $G_{FF}$ | 7421,83  | LEIA           | $G_{FF}$ | 257              | LEIA           | $G_{FF}$ | 0,96     |
|                                   | C-3PO          | $G_{FF}$ | 3,67                   | H.SOLO                | $G_{KK}$ | 6097,59  | C-3PO          | $G_{FF}$ | 246              | CHEWBACCA      | $G_{FF}$ | 0,91     |
|                                   | CHEWBACCA      | $G_{FF}$ | 5,67                   | C-3PO                 | $G_{FF}$ | 6050,57  | CHEWBACCA      | $G_{FF}$ | 219              | LUKE           | $G_{FF}$ | 0,88     |
|                                   | H.SOLO         | $G_{CC}$ | 6,00                   | H.SOLO                | $G_{CC}$ | 4889,51  | H.SOLO         | $G_{CC}$ | 214              | H.SOLO         | $G_{CC}$ | 0,86     |
|                                   | C-3PO          | $G_{CC}$ | 7,67                   | LANDO                 | $G_{FF}$ | 4811,81  | C-3PO          | $G_{CC}$ | 197              | C-3PO          | $G_{CC}$ | 0,82     |
|                                   | LANDO          | $G_{FF}$ | 8,33                   | CHEWBACCA             | $G_{FF}$ | 4185,95  | LANDO          | $G_{FF}$ | 167              | LEIA           | $G_{CC}$ | 0,69     |
|                                   | LUKE           | $G_{CC}$ | 9,33                   | C-3PO                 | $G_{CC}$ | 3186,42  | LUKE           | $G_{CC}$ | 164              | LUKE           | $G_{CC}$ | 0,69     |
|                                   | H.SOLO         | $G_{KK}$ | 10,00                  | LUKE                  | $G_{CC}$ | 2969,15  | LEIA           | $G_{CC}$ | 154              | LANDO          | $G_{FF}$ | 0,68     |

Table 15: Top 10 nodes sorted and their different metrics of the multilayer network without the caption layer  $G'$  for each of the 6 SW movies.

| <b>ABBREVIATION</b> | <b>NAME</b>            |
|---------------------|------------------------|
| A.DOPPELGANGER      | AMIDALA DOPPELGANGER 1 |
| B.B.ORGANA          | BREHA BAIL ORGANA      |
| B.VOICE             | BENS VOICE             |
| B.FETT              | BOBA FETT              |
| B.ORGANA            | BAIL ORGANA            |
| C.C.CODY            | CLONE COMMANDER CODY   |
| C.CROWD 1           | CORUSCANT CROWD 1      |
| C.DOOKU             | COUNT DOOKU            |
| C.PANAKA            | CAPT PANAKA            |
| C.TYPHO             | CAPTAIN TYPHO          |
| D.MAUL              | DARTH MAUL             |
| D.S.CONTROLLER      | DEATH STAR CONTROLLER  |
| D.VADER             | DARTH VADER            |
| E.OFFICER 1         | EMPIRE OFFICER 1       |
| E.OFFICER 2         | EMPIRE OFFICER 2       |
| E.OFFICER 3         | EMPIRE OFFICER 3       |
| E.OFFICER 4         | EMPIRE OFFICER 4       |
| E.OFFICER 5         | EMPIRE OFFICER 5       |
| G.GRIEVOUS          | GENERAL GRIEVOUS       |
| H.SOLO              | HAN SOLO               |
| I.OFFICER           | IMPERIAL OFFICER       |
| J.CREW              | JABBA CREW             |
| J.FETT              | JANGO FETT             |
| J.JAR               | JAR JAR                |
| J.MUSICIAN 1        | JABBA MUSICIAN 1       |
| L.TECHNICIAN        | LANDO TECHNICIAN       |
| L.TECHNICIAN        | LANDO TECHNICIAN       |
| M.AMEDDA            | MAS AMEDDA             |
| M.MOTHMA            | MON MOTHMA             |
| M.WINDU             | MACE WINDU             |
| N.GUNRAY            | NUTE GUNRAY            |
| N.NUNB              | NIEN NUNB              |
| O.WAN               | OBI-WAN                |
| P.FOLLOWER          | PALPATINE FOLLOWER     |
| PALPATINE           | PALPATINE              |
| Q.GON               | QUI-GON                |
| R.LEADER            | RED LEADER             |
| R.OFFICER           | REBEL OFFICER          |
| R.OFFICER 2         | REBEL OFFICER 2        |
| R.OLIE              | RIC OLIE               |
| Z.WESSEL            | ZAM WESSEL             |

Table 16: Abbreviation table for character and face names.

| MOVIE  | ABBREVIATION                                    | NAME                                                     |
|--------|-------------------------------------------------|----------------------------------------------------------|
| SW1    | AHMR                                            | ANAKINS HOVEL - MAIN ROOM                                |
|        | FBB                                             | FEDERATION BATTLESHIP - BRIDGE                           |
|        | FBCR                                            | FEDERATION BATTLESHIP - CONFERENCE ROOM                  |
|        | FBH                                             | FEDERATION BATTLESHIP - HALLWAY                          |
|        | FBHOB                                           | FEDERATION BATTLESHIP - HALLWAY - OUTSIDE BRIDGE-        |
|        | FBMB                                            | FEDERATION BATTLESHIP - MAIN BAY                         |
|        | MSAVP                                           | MOS ESPA - ARENA - VIEWING PLATFORM                      |
|        | MER                                             | MOS ESPA - RACETRACK                                     |
|        | NFCS                                            | NABOO FIGHTER - COCKPIT - SPACE                          |
|        | NGP                                             | NABOO GRASS PLAINS                                       |
|        | NPTR                                            | NABOO PALACE - THRONE ROOM                               |
|        | NSC                                             | NABOO SPACECRAFT - COCKPIT                               |
|        | NSMA                                            | NABOO SPACECRAFT - MAIN AREA                             |
|        | NSQC                                            | NABOO SPACECRAFT - QUEENS CHAMBERS                       |
| NSCS   | NABOO STARFIGHTER - COCKPIT - SPACE             |                                                          |
| SCU    | SUB COCKPIT - UNDERWATER                        |                                                          |
| TDNS   | TATOOINE - DESERT - NABOO SPACECRAFT            |                                                          |
| TCH    | THEED - CENTRAL HANGER                          |                                                          |
| SW2    | CCD                                             | CITYSCAPE CORUSCANT - DAWN                               |
|        | CNSS                                            | COCKPIT NABOO STARSHIP - SUNSET                          |
|        | CJTCC                                           | CORUSCANT JEDI TEMPLE COUNCIL CHAMBER                    |
|        | CMSC                                            | CORUSCANT MAIN SENATE CHAMBER                            |
|        | GEA                                             | GEONOSIS EXECUTION ARENA                                 |
|        | GLA                                             | GEONOSIS LANDING AREA                                    |
|        | SBPAB                                           | SENATE BUILDING PADMES APARTMENT BEDROOM                 |
|        | SP                                              | SPACE                                                    |
|        | TDHMF                                           | TATOOINE DESERT HOMESTEAD MOISTURE FARM                  |
|        | TC                                              | TIPOCA CITY (RAINSTORM)                                  |
|        | TCCE                                            | TIPOCA CITY CORRIDOR ENTRANCE                            |
| TCFA   | TIPOCA CITY FETT APARTMENT                      |                                                          |
| TCKLP  | TIPOCA CITY KAMINO LANDING PLATFORM (RAINSTORM) |                                                          |
| THMF   | TATOOINE HOMESTEAD MOISTURE FARM                |                                                          |
| THG    | TATOOINE HOMESTEAD - GARAGE                     |                                                          |
| SW3    | ASH                                             | ALDERAAN STARCRUISER - HALLWAY                           |
|        | BOOC                                            | BAIL ORGANAS OFFICE - CORUSCANT                          |
|        | CO                                              | CHANCELLORS OFFICE                                       |
|        | CCPD                                            | CITYSCAPE - CORUSCANT - PRE-DAWN                         |
|        | CSACHO                                          | CORRIDOR - SENATE ARENA - CHANCELLORS HOLDING OFFICE     |
|        | CJTH                                            | CORUSCANT - JEDI TEMPLE - HALLWAY                        |
|        | CSCMA                                           | CORUSCANT - SENATE CHAMBER - MAIN ARENA                  |
|        | DVQSD                                           | DARTH VADER'S QUARTERS - STAR DESTROYER                  |
|        | IDC                                             | INDUSTRIAL DISTRICT - CORUSCANT                          |
|        | LPCIRC                                          | LANDING PLATFORM - CORUSCANT - IMPERIAL REHAB CENTER     |
|        | LPN                                             | LANDING PLATFORM - NABOO SKIFF                           |
|        | MFJT                                            | MAIN FLOOR - JEDI TEMPLE                                 |
|        | MCP                                             | MUSTAFAR - COLLECTION PANELS                             |
|        | MLP                                             | MUSTAFAR - LANDING PLATFORM                              |
|        | MLPR                                            | MUSTAFAR - LANDING PLATFORM ROOM                         |
|        | MMCC                                            | MUSTAFAR - MAIN CONTROL CENTER                           |
|        | OBS                                             | OBJI-WAN'S STARFIGHTER                                   |
|        | PJTC                                            | PLAZA - JEDI TEMPLE - CORUSCANT                          |
| PJTCTR | PLAZA - JEDI TEMPLE - CORUSCANT-ROOM            |                                                          |
| SC     | SENATE CHAMBER                                  |                                                          |
| SCC    | SENATE CHAMBER - CORUSCANT                      |                                                          |
| UCRGC  | UTAPAU - CONFERENCE ROOM - GRAND CHAMBER        |                                                          |
| ULP    | UTAPAU - LANDING PLATFORM                       |                                                          |
| SW4    | DSCR                                            | DEATH STAR - CONFERENCE ROOM                             |
|        | DSCTR                                           | DEATH STAR - CONTROL ROOM                                |
|        | DSH                                             | DEATH STAR - HALLWAY                                     |
|        | GLYWC                                           | GOLD LEADERS Y-WING - COCKPIT                            |
|        | LXWCT                                           | LUKES X-WING - COCKPIT - TRAVELING                       |
|        | LXFC                                            | LUKES X-WING FIGHTER - COCKPIT                           |
|        | MLP                                             | MUSTAFAR - LANDING PLATFORM                              |
|        | MOWR                                            | MASSASSI OUTPOST - WAR ROOM                              |
|        | MFC                                             | MILLENNIUM FALCON - COCKPIT                              |
|        | MFGC                                            | MILLENNIUM FALCON - GUNPORTS - COCKPIT                   |
|        | RLC                                             | RED LEADERS COCKPIT                                      |
|        | SATDS                                           | SPACE AROUND THE DEATH STAR                              |
|        | SIS                                             | SPACECRAFT IN SPACE                                      |
| SOTDS  | SURFACE OF THE DEATH STAR                       |                                                          |
| TDW    | TATOOINE - DESERT WASTELAND                     |                                                          |
| TLH    | TATOOINE - LARS HOMESTEAD                       |                                                          |
| SW5    | BOCCWVD                                         | BOTTOM OF CLOUD CITY - WEATHER VANE - DUSK               |
|        | CCC                                             | CLOUD CITY - CORRIDOR                                    |
|        | CCLPMF                                          | CLOUD CITY - LANDING PLATFORM - MILLENNIUM FALCON        |
|        | DVSDBMCD                                        | DARTH VADERS STAR DESTROYER - BRIDGE - MAIN CONTROL DECK |
|        | HB                                              | HOTH - BATTLEFIELD                                       |
|        | HIPST                                           | HOTH - ICE PLAIN - SNOW TRENCH                           |
|        | HRBCC                                           | HOTH - REBEL BASE - COMMAND CENTER                       |
|        | HRBMHD                                          | HOTH - REBEL BASE - MAIN HANGAR DECK                     |
|        | LSRLC                                           | LUKES SNOWSPEEDER ROGUE LEADER - COCKPIT                 |
|        | LXWC                                            | LUKES X-WING - COCKPIT                                   |
|        | MHMFC                                           | MAIN HANGAR - MILLENNIUM FALCON - COCKPIT                |
|        | MFC                                             | MILLENNIUM FALCON - COCKPIT                              |
|        | MFGAC                                           | MILLENNIUM FALCON - GIANT ASTEROID CRATER                |
|        | MFH                                             | MILLENNIUM FALCON - HOLD                                 |
| MFSQ   | MILLENNIUM FALCON - SLEEPING QUARTERS           |                                                          |
| MHMFC  | MAIN HANGAR - MILLENNIUM FALCON - COCKPIT       |                                                          |
| RBMC   | REBEL BASE - MEDICAL CENTER                     |                                                          |
| SIF    | SPACE - IMPERIAL FLEET                          |                                                          |
| WSRTC  | WEDGES SNOWSPEEDER ROGUE THREE - COCKPIT        |                                                          |
| SW6    | BE                                              | BUNKER - ENTRANCE                                        |
|        | DSMDB                                           | DEATH STAR - MAIN DOCKING BAY                            |
|        | DSLA                                            | DUNE SEA - LANDING AREA                                  |
|        | ETTR                                            | EMPERORS TOWER - THRONE ROOM                             |
|        | FGB                                             | FOREST - GENERATOR BUNKER                                |
|        | FLSE                                            | FOREST LANDING SITE - ENDOR                              |
|        | JTR                                             | JABBAS THRONE ROOM                                       |
|        | MFC                                             | MILLENNIUM FALCON - COCKPIT                              |
|        | MHMFC                                           | MAIN HANGAR - MILLENNIUM FALCON - COCKPIT                |
|        | RSCB                                            | REBEL STAR CRUISER - BRIDGE                              |
|        | RTJPT                                           | ROAD TO JABBAS PALACE - TATOOINE                         |
|        | SKI                                             | SKIFF                                                    |
| SRF    | SPACE - REBEL FLEET                             |                                                          |
| SAT    | SPACE ABOVE TATOOINEA                           |                                                          |

Table 17: Abbreviation table for location names.
